# Supplementary material
Source: MDPI journal article supplement (https://www.mdpi.com/2624-781X/5/1/9)
Supplement: s1 [file s1]

## Supporting Information

# Reduction and Cycloaddition of Heteroalkenes at Ga(I) Bisamide Center

Vladimir A. Dodonov, Olga A. Kushnerova, Evgeny V. Baranov and Igor L. Fedushkin \*

G.A. Razuvaev Institute of Organometallic Chemistry, Russian Academy of Sciences, Tropinina Str. 49, 603137 Nizhny Novgorod, Russia; dodonov@iomc.ras.ru (V.A.D.); kushnerova@iomc.ras.ru (O.A.K.); bar@iomc.ras.ru (E.V.B.)

\* Correspondence: igorfed@iomc.ras.ru

### Experimental Section

All compounds are air- and moisture-sensitive, the manipulations were carried out in vacuum or under argon using standard Schlenk technique or under argon atmosphere in a drybox. Solvents (diethyl ether, 1,2-dimethoxyethane, pyridine, tetrahydrofuran) were dried using appropriate methods and were distilled under argon or condensed in vacuum prior to use. C<sub>6</sub>D<sub>6</sub>, THF-d<sub>8</sub> and pyridine-d<sub>5</sub> were dried over Na/K alloy. [(dpp-bian)GaNa(DME)<sub>2</sub>] (**1**), [88] was prepared according to literature procedures. Other chemicals were purchased from commercial sources and used without further purification. The IR spectra were recorded on FSM-1201 spectrometer in Nujol, the NMR spectra – on Bruker AvanceNEO300 (300 MHz) or Avance III (400 MHz) spectrometers and were referenced to the residual <sup>1</sup>H or <sup>13</sup>C signals of deuterated solvents. Chemical shifts are given in ppm. Abbreviations used: Ph – phenyl, Napht – naphthalene, d – doublet, m – multiplet, t – triplet, pst – pseudotriplet, s – singlet, br – broad, hept – heptet. Elemental analyses were carried out on Elementar VarioEL III instrument.

#### *Synthesis of 2.*

0.119 g (1 mmol) of phenyl isocyanate was added to a yellow-green solution of **1** in 10 ml of DME at 25 °C. The solution color changed to green within 5 min. The vessel was sealed and stored two days at -20 °C. That gave green needles of compound **2**. Yield 0.220 g, 18%. IR (nujol, cm<sup>-1</sup>) 1640 s, 1592 s, 1515 s, 1490 w, 1429 w, 1341 s, 1319 s, 1283 w, 1255 m, 1211 m, 1189 m, 1178 m, 1112 s, 1081 s, 1032 w, 999 m, 982 w, 956 w, 935 s, 927 s, 877 m, 858 m, 844 m, 819 w, 808 s, 783 w, 761 s, 742 m, 692 m, 684 w, 667 w, 662 w, 645 w, 623 m, 590 w, 571 w, 548 w, 540 w, 518 m. <sup>1</sup>H NMR (400 MHz, THF-d<sub>8</sub>): δ 7.53 (d, 2H, CH Ph, J = 7.5 Hz), 7.23 (t, 2H, CH Ph, J = 7.6 Hz), 7.04 (t, 1H, CH Ph, J = 7.8 Hz), 6.99 (d, 4H, CH Ph, J = 7.5 Hz), 6.97 (d, 4H, CH Ph, J = 9.2 Hz), 6.94 (t, 2H, CH Ph, J = 4.5 Hz), 6.81 (d, 2H, CH Napht, J = 8.0 Hz), 6.76 (t, 4H, CH Ph, J = 7.6 Hz), 6.64 (pst, 2H, CH Napht, J = 8.3 Hz, J = 7.3 Hz), 6.55 (t, 2H, CH Ph, J = 7.3 Hz), 5.73 (d, 2H, CH Napht, J = 6.8 Hz), 3.74 (sept, 4H, CH<sub>3</sub>iPr, J = 6.8 Hz), 0.89 (d, 12H, CH<sub>3</sub>iPr, J = 6.8 Hz), 0.75 (d, 12H, CH<sub>3</sub>iPr, J = 6.8 Hz). <sup>13</sup>C NMR (75 MHz, THF-d<sub>8</sub>): δ 152.8 (C=N), 146.2 (C Ph), 145.4 (C Ph), 140.3 (C Ph), 137.3 (C Napht), 136.9 (C Ph), 135.1 (C Napht), 128.7 (C Napht), 128.3 (C-N), 127.9 (CH Ph), 127.8 (CH Ph), 126.7 (CH Ph), 126.1 (CH Napht), 124.1 (CH Ph), 122.5 (CH Ph), 122.4 (CH Ph), 121.9 (CH Napht), 121.4 (CH Ph), 120.8 (CH Ph), 115.7 (CH Napht), 27.4 (CH iPr), 24.5 (CH<sub>3</sub>iPr), 24.1 (CH<sub>3</sub>iPr). Elemental analysis C<sub>72</sub>H<sub>95</sub>GaN<sub>5</sub>NaO<sub>7</sub> (1235.23), calc. C 70.00, H 7.75, N 5.66 %; found C 69.93, H 8.01, N 5.73 %. A further concentration of mother liquor gave a mixture of **2** and [(dpp-bian)GaO]<sub>2</sub>[Na(DME)<sub>2</sub>]<sub>2</sub> (**6**) as a minor product.

#### *Synthesis of 3 and 4.*

0.125 g (1 mmol) of cyclohexyl isocyanate was added to a yellow-green solution of **1** in 10 ml of DME at 25 °C. The solution color changed to green within 5 min. All volatiles were removed in a vacuum. The residue was dissolved in 5 ml of THF. Layering

the solution with 20 ml of Et<sub>2</sub>O gave a mixture of green crystals of compounds **3** and **4**. Yield 0.168 g. IR (nujol, cm<sup>-1</sup>) 1628 m, 1602 m, 1517 s, 1352 w, 1316 w, 1258 m, 1178 m, 1153 m, 1106 w, 1078 w, 1045 m, 963 w, 924 m, 894 m, 805 m, 758 s, 617 m, 548 s.

#### *Synthesis of 5.*

0.250 g (2 mmol) of cyclohexyl isocyanate was added to a yellow-green solution of **1** in 10 ml of THF at 25 °C. The solution color changed to blue within 5 min. All volatiles were removed in a vacuum. The residue was dissolved in 5 ml of pyridine. Slow concentration gave blue crystals of compound **5**. Yield 0.150 g, 11%. IR (nujol, cm<sup>-1</sup>) 1711 m, 1661 m, 1581 s, 1517 w, 1256 m, 1214 w, 1108 w, 1069 w, 1029 m, 990 m, 926 w, 892 w, 800 w, 766 w, 747 m, 701 s, 601 w. <sup>1</sup>H NMR (400 MHz, C<sub>6</sub>D<sub>6</sub>): δ 7.35 – 7.23 (m, 6H Ph), 7.12 (d, 2H, CH Napht, *J* = 8.2 Hz), 6.86 (dd, 2H, CH Napht, *J* = 8.3, *J* = 6.9 Hz), 6.29 (d, 2H, CH Napht, *J* = 6.9 Hz), 4.82 (br. s, 1H, CH Cy), 4.31 (sept, 2H, CH iPr, *J* = 6.9 Hz), 4.05 (sept, 2H, CH iPr, *J* = 6.9 Hz), 3.54 (br. s, 1H, CH Cy), 2.79 (br. s, 2H, CH<sub>2</sub> Cy), 1.89 (m, 2H, CH<sub>2</sub> Cy), 1.70 (br. s, 4H, CH<sub>2</sub> Cy), 1.57 (m, 4H, CH<sub>2</sub> Cy), 1.45 (d, 6H, CH<sub>3</sub> iPr, *J* = 6.9 Hz), 1.37 (m, 4H, CH<sub>2</sub> Cy), 1.32 (d, 6H, CH<sub>3</sub> iPr, *J* = 6.8 Hz), 1.26 (d, 6H, CH<sub>3</sub> iPr, *J* = 6.8 Hz), 1.18 (m, 4H, CH<sub>2</sub> Cy), 1.07 (d, 6H, CH<sub>3</sub> iPr, *J* = 6.9 Hz). <sup>13</sup>C NMR (75 MHz, C<sub>6</sub>D<sub>6</sub>): δ 164.1 (C=O), 163.7 (C=N), 147.8 (C Ph), 145.9 (C Ph), 144.6 (C Ph), 137.3 (C Napht), 134.5 (C Napht), 127.8 (CH Napht), 127.5 (C Napht), 126.1 (C–N), 125.2 (CH Ph), 125.1 (CH Ph), 123.5 (CH Napht), 123.4 (CH Ph), 117.9 (CH Napht), 67.4 (CH Cy), 55.4 (CH Cy), 35.9 (CH<sub>2</sub> Cy), 30.2 (CH<sub>2</sub> Cy), 28.9 (CH iPr), 28.3 (CH iPr), 27.4 (CH<sub>2</sub> Cy), 26.5 (CH<sub>2</sub> Cy), 26.5 (CH<sub>3</sub> iPr), 25.7 (CH<sub>3</sub> iPr), 25.3 (CH<sub>2</sub> Cy), 25.3 (CH<sub>3</sub> iPr), 24.9 (CH<sub>3</sub> iPr), 23.2 (CH<sub>2</sub> Cy). Elemental analysis C<sub>82.5</sub>H<sub>94.5</sub>GaN<sub>10.5</sub>NaO<sub>2</sub> (1357.89), calc. C 72.97, H 7.01, N 10.83 %; found C 72.67, H 6.73, N 11.01 %.

#### *Synthesis of 6.*

25 ml (25 °C, 1 atm, 1 mmol) of dinitrogen monoxide was added to a yellow-green solution of **1** in 10 ml of DME at 25 °C. The solution color changed to green within 5 min. The solution was stirred for 10 minutes. All volatiles were removed in a vacuum. The residue was dissolved in 5 ml of THF. Slow concentration gave green crystals of compound **6**. Yield 0.950 g, 66%. IR (nujol, cm<sup>-1</sup>) 1589 m, 1519 s, 1428 s, 1347 w, 1255 s, 1208 m, 1208 m, 1192 m, 1178 m, 1116 m, 1084 m, 1028 m, 996 m, 981 m, 926 s, 898 m, 881 w, 885 m, 808 s, 765 s, 681 m, 624 s, 589 w, 550 s, 519 w, 499 w. <sup>1</sup>H NMR (400 MHz, THF-*d*<sub>8</sub>): δ 7.08 – 6.90 (m, 12H, CH Ph), 6.74 (d, 4H, CH Napht, *J* = 8.3 Hz), 6.58 (dd, 4H, CH Napht, *J* = 7.0 Hz, *J* = 6.8 Hz), 5.55 (d, 4H, CH Napht, *J* = 6.8 Hz), 3.77 (sept, 8H, CH iPr, *J* = 7.0 Hz, *J* = 6.8 Hz), 0.96 (d, 24H, CH<sub>3</sub> iPr, *J* = 6.8 Hz), 0.86 (d, 24H, CH<sub>3</sub> iPr, *J* = 6.5 Hz). <sup>13</sup>C NMR (75 MHz, THF-*d*<sub>8</sub>): δ 144.1 (C Ph), 135.4 (C Napht), 130.4 (C Napht), 126.1 (C Napht), 125.7 (C Napht), 124.4 (CH Napht), 123.9 (C Ph), 121.4 (CH Ph), 120.6 (CH Ph), 120.4 (CH Ph), 119.3 (CH Napht), 113.6 (CH Napht), 25.5 (CH iPr), 22.2 (CH<sub>3</sub> iPr), 21.9 (CH<sub>3</sub> iPr). Elemental analysis C<sub>82</sub>H<sub>105</sub>Ga<sub>2</sub>N<sub>4</sub>Na<sub>2</sub>O<sub>6.9</sub> (1442.51), calc. C 68.21, H 7.27, N 3.88 %; found C 67.94, H 7.01, N 4.07 %.

#### *Synthesis of 7.*

25 ml (25 °C, 1 atm, 1 mmol) of carbonyl sulfide was added to a solution of **1** mmol of **1** in DME (10 ml). The reaction mixture color was changed from yellow-green to greenish brown. Green crystals of complex **7** were obtained from THF. Yield 0.35 g, 35 %. IR (nujol, cm<sup>-1</sup>): 1761 w, 1664 w, 1645 w, 1590 s, 1540 w, 1512 m, 1344 w, 1258 s, 1208 w, 1190 w, 1175 m, 1109 w, 1079 w, 1057 w, 999 m, 924 m, 894 w, 855 m, 836 m, 822 m, 805 s, 761 s, 681 s, 645 s, 623 s, 587 m, 548 m, 515 m. Elemental analysis C<sub>112</sub>H<sub>164</sub>Ga<sub>2</sub>N<sub>4</sub>Na<sub>2</sub>O<sub>12</sub>S<sub>2</sub> (2008.00), calc: C 66.98, H 8.23, N 2.79, S 3.19 %. found: C 67.28, H 8.41, N 3.06, S 3.33%.

#### *Synthesis of 8.*

0.125 g (1 mmol) of cyclohexyl isocyanate was added to a yellow-green solution of **1** mmol of **1** in 10 ml of THF at 25 °C. The solution color changed to greenish-blue within 5 min. All volatiles were removed in a vacuum. The residue was dissolved in 5 ml of DME.

Slow concentration gave green crystals of compound **8**. Crystals suitable for XRD were obtained from C<sub>6</sub>D<sub>6</sub>. Yield 0.075 g, 9%. IR (nujol, cm<sup>-1</sup>) 3364 m (N–H), 1622 m, 1591 s, 1522 s, 1334 s, 1246 m, 1211 w, 1192 w, 1180 w, 1131 w, 1114 m, 1088 s, 1064 w, 1033 m, 976 w, 923 m, 894 w, 861 w, 851 w, 804 m, 763 s. <sup>1</sup>H NMR (400 MHz, THF-*d*<sub>5</sub>): δ 6.92 (m, 4H, CH Ph), 6.83 (m, 4H, CH Napht), 6.72 (t, 4H, CH Ph, *J* = 7.5 Hz), 6.63 (t, 4H, CH Napht, *J* = 6.6 Hz), 6.50 (m, 4H, CH Ph), 5.79 (d, 1H, N–H), 5.46 (dd, 4H, CH Napht, *J* = 6.9, *J* = 2.3 Hz), 3.84 (m, 4H, CH *i*Pr), 3.48 (m, 4H, CH *i*Pr), 3.07 (m, 1H, CH Cy), 2.20 (d, 4H, CH<sub>2</sub> Cy, *J* = 11.5 Hz), 1.99 (br. s, 4H, CH<sub>2</sub> Cy), 1.20 (d, 12H, CH<sub>3</sub> *i*Pr, *J* = 5.8 Hz), 1.12 (m, 2H, CH<sub>2</sub> Cy), 1.03 (d, 12H, CH<sub>3</sub> *i*Pr, *J* = 4.6 Hz), 0.74 (d, 12H, CH<sub>3</sub> *i*Pr, *J* = 5.5 Hz), 0.71 (d, 12H, CH<sub>3</sub> *i*Pr, *J* = 9.1 Hz). Elemental analysis C<sub>94</sub>H<sub>122</sub>D<sub>3</sub>Ga<sub>2</sub>N<sub>5</sub>NaO<sub>9</sub> (1634.43), calc. C 69.07, H 7.89, N 4.28 %; found C 68.61, H 8.26, N 4.01 %.

#### Synthesis of 9.

0.364 g (2 mmol) of benzophenone was added to a yellow-green solution of **1** in 10 ml of THF at 25 °C. The solution color changed to green within 5 min. All volatiles were removed in a vacuum. The residue was dissolved in 5 ml of pyridine. Slow concentration gave green crystals of compound **9**. Yield 0.591 g, 53 %. IR (nujol, cm<sup>-1</sup>) 1592 s, 1515 s, 1338 s, 1255 s, 1181 m, 1106 m, 1051 s, 999 s, 924 s, 902 m, 852 m, 805 s, 767 s, 750 s, 706 s, 617 s, 518 m, 460 s. <sup>1</sup>H NMR (400 MHz, Py-*d*<sub>5</sub>): δ 7.76 (d, 8H, CH Ph, *J* = 7.3 Hz), 7.38 (br. s, 6H, CH Ph), 6.95 (d, 2H, CH Napht, *J* = 8.3 Hz), 6.84 (d, 2H, CH Napht), 6.82 (m, 12H, CH Ph), 6.13 (d, 2H, CH Napht, *J* = 8.3 Hz), 4.48 (sept, 4H, CH *i*Pr, *J* = 6.8 Hz), 1.35 (d, 12H, CH<sub>3</sub> *i*Pr, *J* = 6.8 Hz), 1.26 (d, 12H, CH<sub>3</sub> *i*Pr, *J* = 6.8 Hz). <sup>13</sup>C NMR (75 MHz, Py-*d*<sub>5</sub>): δ 152.8 (C=N), 150.9 (C Napht), 147.8 (C Ph), 147.1 (C Ph), 137.9 (C Napht), 135.8 (C Ph), 132.8 (C Napht), 130.3 (CH Ph), 128.3 (C–N), 127.2 (CH Napht), 125.9 (CH Ph), 124.2 (CH Ph), 123.6 (CH Ph), 123.0 (CH Ph), 121.7 (CH Napht), 116.5 (CH Napht), 88.6 (C–O), 28.2 (CH *i*Pr), 25.0 (CH<sub>3</sub> *i*Pr), 23.9 (CH<sub>3</sub> *i*Pr). Elemental analysis C<sub>77</sub>H<sub>70</sub>Ga<sub>4</sub>NaO<sub>2</sub> (1116.06), calc. C 78.63, H 5.99, N 4.76 %; found C 78.88, H 6.27, N 4.96 %.

#### Synthesis of 10.

0.388 g (2 mmol) of diphenylketene was added to a yellow-green solution of **1** in 10 ml of DME at 25 °C. The solution color changed to green within 5 min. Storage a solution at -20 °C gave green crystals of compound **10**. Yield 0.257 g, 22%. IR (nujol, cm<sup>-1</sup>) 1606 w, 1551 m, 1520 m, 1493 w, 1343 w, 1258 s, 1181 m, 1123 w, 1082 m, 1057 m, 1003 w, 986 w, 924 s, 903 s, 856 s, 808 s, 766 s, 700 s, 673 s, 648 m, 623 w, 549 m. <sup>1</sup>H NMR (400 MHz, THF-*d*<sub>5</sub>): δ 7.76 (d, 2H, CH Ph, *J* = 7.5 Hz), 7.36 (d, 2H, CH Ph, *J* = 7.3 Hz), 7.15 – 7.09 (m, 4H, CH Ph), 7.08 – 7.01 (m, 8H, CH Ph), 6.91 (d, 2H, CH Ph, *J* = 7.5 Hz), 6.87 (d, 2H, CH Napht, *J* = 8.3 Hz), 6.81 (d, 2H, CH Ph, *J* = 7.0 Hz), 6.77 – 6.65 (d, 2H, CH Napht, 6H, CH Ph), 5.72 (d, 2H, CH napht, *J* = 6.8 Hz), 3.97 (sept, 2H, CH *i*Pr, *J* = 6.7 Hz), 3.86 (sept, 2H, CH *i*Pr, *J* = 6.4 Hz), 1.25 (d, 6H, CH<sub>3</sub> *i*Pr, *J* = 6.8 Hz), 0.96 (d, 12H, CH<sub>3</sub> *i*Pr, *J* = 6.8 Hz), 0.93 (d, 6H, CH<sub>3</sub> *i*Pr, *J* = 6.8 Hz). <sup>13</sup>C NMR (75 MHz, THF-*d*<sub>5</sub>): δ 161.1 (O=C=O), 158.1 (O=C–Ga), 149.9 (C Ph), 148.7 (C Ph), 146.9 (C Ph), 145.5 (C Ph), 144.0 (C Ph), 143.9 (C Ph), 143.8 (C Ph), 138.9 (C Napht), 135.2 (C Napht), 132.4 (CH Ph), 132.3 (CH Ph), 131.0 (C–N), 130.9 (CH Ph), 129.9 (C Napht), 129.3 (CH Ph), 129.2 (CH Ph), 128.4 (CH Ph), 128.3 (CH Napht), 127.6 (Ph<sub>2</sub>C=COGa), 127.4 (CH Ph), 126.7 (CH Ph), 125.9 (CH Ph), 125.8 (CH Ph), 125.3 (CH Ph), 124.7 (CH Ph), 123.6 (CH Ph), 123.3 (CH Ph), 123.2 (CH Ph), 122.4 (CH Napht), 117.8 (CH Napht), 88.6 (Ph<sub>2</sub>C=CO<sub>2</sub>), 29.5 (CH *i*Pr), 29.4 (CH *i*Pr), 27.3 (CH<sub>3</sub> *i*Pr), 26.4 (CH<sub>3</sub> *i*Pr), 25.6 (CH<sub>3</sub> *i*Pr), 25.3 (CH<sub>3</sub> *i*Pr). Elemental analysis C<sub>78</sub>H<sub>95</sub>Ga<sub>4</sub>N<sub>2</sub>NaO<sub>9</sub> (1297.26), calc. C 72.31, H 7.38, N 2.15 %; found C 71.95, H 7.52, N 1.96 %.

#### Synthesis of 11.

0.416 g (2 mmol) of 1,2-dibenzylidenetrihydrazine was added to a yellow-green solution of **1** in 10 ml of Et<sub>2</sub>O at 25 °C. The solution color changed to green within 5 min. All volatiles were removed in a vacuum. The residue was dissolved in 5 ml of DME. Storage a solution at 20 °C two days gave green crystals of compound **11**. Yield 0.493 g, 39%. IR (nujol, cm<sup>-1</sup>) 1661 m, 1598 m, 1581 m, 1545 w, 1512 w, 1341 w, 1247 w, 1192 w,

1117 w, 1068 w, 1029 w, 999 m, 924 m, 899 w, 858 m, 808 s, 756 s, 698 s, 637 m, 615 m, 582 w.  $^1\text{H}$  NMR (400 MHz, THF-*d*<sub>8</sub>):  $\delta$  7.37 (br. s, 2H, N=CH(Ph)), 7.18 (d, 4H, CH Ph,  $J$  = 7.9 Hz), 7.14 (s, 4H, CH Ph), 7.01 (t, 4H, CH Ph,  $J$  = 7.4 Hz), 6.75 (t, 8H, 2  $\times$  CH Napht, 6  $\times$  CH Ph,  $J$  = 6.9 Hz), 6.65 (m, 8H, 2  $\times$  CH Napht, 6  $\times$  CH Ph), 5.69 (d, 1H, CH Napht,  $J$  = 6.6 Hz), 5.56 (d, 1H, CH Napht,  $J$  = 6.6 Hz), 5.08 (s, 2H, N-CH(Ph)), 4.18 (sept, 2H, CH iPr,  $J$  = 7.2 Hz), 4.12 (sept, 2H, CH iPr,  $J$  = 7.2 Hz), 1.2 (d, 6H, CH<sub>3</sub> iPr,  $J$  = 6.5 Hz), 1.07 (d, 6H, CH<sub>3</sub> iPr,  $J$  = 6.5 Hz), 1.04 (d, 6H, CH<sub>3</sub> iPr,  $J$  = 6.6 Hz), 0.87 (d, 6H, CH<sub>3</sub> iPr,  $J$  = 6.5 Hz).  $^{13}\text{C}$  NMR (75 MHz, THF-*d*<sub>8</sub>):  $\delta$  148.0 (C Ph), 147.6 (C Ph), 146.6 (C Ph), 146.1 (C Ph), 145.3 (C Napht), 140.0 (C Ph), 137.7 (C Napht), 132.4 (C Napht), 132.3 (C Napht), 131.2 (H-C=N), 129.0 (CH Ph), 128.3 (C Napht), 128.1 (CH Ph), 128.0 (CH Ph), 127.6 (CH Ph), 126.9 (CH Ph), 126.2 (CH Napht), 126.2 (CH Ph), 126.1 (CH Napht), 125.5 (CH Ph), 125.4 (CH Ph), 124.6 (CH Ph), 124.5 (CH Ph), 123.5 (CH Ph), 123.4 (CH Ph), 122.4 (CH Ph), 122.3 (CH Ph), 121.1 (CH Napht), 120.8 (CH Napht), 116.1 (CH Napht), 115.8 (CH Napht), 68.8 (H-C-N), 27.7 (CH iPr), 27.2 (CH iPr), 24.8 (CH<sub>3</sub> iPr), 24.6 (CH<sub>3</sub> iPr), 23.9 (CH<sub>3</sub> iPr), 23.7 (CH<sub>3</sub> iPr). Elemental analysis C<sub>76</sub>H<sub>94</sub>GaN<sub>6</sub>NaO<sub>6</sub> (1280.28), calc. C 71.29, H 7.40, N 6.56 %; found C 70.90, H 7.62, N 6.42 %.

#### Synthesis of 12.

0.206 g (1 mmol) of 1,2-dibenzylidenehydrazine was added to a yellow-green solution of 1 mmol of **1** in 10 ml of DME at 25 °C. The solution color changed to green within 5 min. All volatiles were removed in a vacuum. The residue was dissolved in 5 ml of pyridine. Solution was heated at 80 °C during 2 hours. All volatiles were removed in a vacuum. The residue was dissolved in 5 ml of DME. Layering the solution with 10 ml of Et<sub>2</sub>O gave green crystals of compounds **12**. Yield 0.476 g, 40%. IR (nujol, cm<sup>-1</sup>) 1661 m, 1605 w, 1581 w, 1548 m, 1341 w, 1319 w, 1255 m, 1208 w, 1192 w, 1123 w, 1087 w, 1032 w, 998 w, 927 s, 899 s, 860 s, 805 s, 764 s, 706 s, 651 m, 590 s, 568 m, 515 m.  $^1\text{H}$  NMR (400 MHz, THF-*d*<sub>8</sub>):  $\delta$  7.73 (s, 1H, N=CH(Ph)), 7.28 (d, 2H, CH Ph,  $J$  = 7.5 Hz), 7.09 (m, 10H, CH Ph), 6.85 (m, 2H, CH Napht), 6.74 (m, 4H, CH Ph), 6.62 (d, 1H, C<sub>5</sub>H<sub>5</sub>(6)N,  $J$  = 6.8 Hz), 6.58 (pent, 2H, CH Napht,  $J$  = 7.5 Hz), 5.57 (d, 1H, CH Napht,  $J$  = 6.8 Hz), 5.79 (d, 1H, CH Napht,  $J$  = 6.8 Hz), 5.44 (t, 1H, C<sub>5</sub>H<sub>5</sub>(4)N,  $J$  = 7.0 Hz), 4.58 (d, 1H, N-CH(Ph),  $J$  = 9.5 Hz), 4.29 (t, 1H, C<sub>5</sub>H<sub>5</sub>(5)N,  $J$  = 5.6 Hz), 4.23 (d, 1H, C<sub>5</sub>H<sub>5</sub>(3)N,  $J$  = 9.6 Hz), 4.18 (sept, 1H, CH iPr,  $J$  = 6.8 Hz), 4.00 (d, 1H, C<sub>5</sub>H<sub>5</sub>(2)N,  $J$  = 6.6 Hz), 3.94 (sept, 1H, CH iPr,  $J$  = 6.9 Hz), 3.86 (sept, 1H, CH iPr,  $J$  = 6.8 Hz), 3.78 (sept, 1H, CH iPr,  $J$  = 6.9 Hz), 1.25 (d, 6H, CH<sub>3</sub> iPr,  $J$  = 7.0 Hz), 1.16 (d, 3H, CH<sub>3</sub> iPr,  $J$  = 6.8 Hz), 1.10 (d, 3H, CH<sub>3</sub> iPr,  $J$  = 6.5 Hz), 1.01 (d, 3H, CH<sub>3</sub> iPr,  $J$  = 6.8 Hz), 0.95 (d, 3H, CH<sub>3</sub> iPr,  $J$  = 6.5 Hz), 0.90 (d, 3H, CH<sub>3</sub> iPr,  $J$  = 6.8 Hz), 0.76 (d, 3H, CH<sub>3</sub> iPr,  $J$  = 6.8 Hz).  $^{13}\text{C}$  NMR (75 MHz, THF-*d*<sub>8</sub>):  $\delta$  147.7, 147.4, 147.3, 147.1, 146.5, 146.4, 146.1, 145.9, 145.7, 145.4, 143.8, 143.7 (C<sub>5</sub>H<sub>5</sub>N), 140.2 (CH Napht), 137.6, 132.9, 132.6, 132.3, 131.5 (H-C=N), 129.0, 128.1, 127.8, 127.5, 127.0, 126.9, 126.7, 126.2, 126.1 (CH Napht), 125.5 (C<sub>5</sub>H<sub>5</sub>N), 124.3, 124.2, 123.3, 122.9, 122.6, 121.7, 121.1, 119.0, 115.9 (CH Napht), 115.7 (CH Napht), 104.6 (C<sub>5</sub>H<sub>5</sub>N), 92.5 (C<sub>5</sub>H<sub>5</sub>N), 73.3 (H-C-N), 62.5 (C<sub>5</sub>H<sub>5</sub>N), 27.8 (CH iPr), 27.6 (CH iPr), 26.8 (CH iPr), 26.7 (CH iPr), 25.6 (CH<sub>3</sub> iPr), 25.5 (CH<sub>3</sub> iPr), 25.2 (CH<sub>3</sub> iPr), 24.9 (CH<sub>3</sub> iPr), 23.5 (CH<sub>3</sub> iPr), 23.4 (CH<sub>3</sub> iPr), 22.9 (CH<sub>3</sub> iPr), 22.6 (CH<sub>3</sub> iPr). Elemental analysis C<sub>69</sub>H<sub>92</sub>GaN<sub>5</sub>NaO<sub>6.5</sub> (1188.18), calc. C 69.68, H 7.74, N 5.89 %; found C 69.31, H 7.52, N 6.1 %.

#### Synthesis of 12-*d*<sup>5</sup>.

0.206 g (1 mmol) of 1,2-dibenzylidenehydrazine was added to a yellow-green solution of 1 mmol of **1** in 10 ml of DME at 25 °C. The solution color changed to green within 5 min. All volatiles were removed in a vacuum. The residue was dissolved in 5 ml of pyridine-*d*<sub>5</sub>. Solution was heated at 80 °C during 2 hours. All volatiles were removed in vacuum. The residue was dissolved in 5 ml of DME. Layering the solution with 10 ml of Et<sub>2</sub>O gave green crystals of compounds **12-*d*<sup>5</sup>**. Yield 0.432 g, 36%. IR (nujol, cm<sup>-1</sup>) 2263 w, 2236 w, 1670 m, 1591 m, 1546 m, 1511 w, 1337 w, 1262 w, 1192 w, 1132 w, 1032 w, 983 w, 923 m, 893 w, 863 m, 808 m, 758 s, 694 s, 660 w, 580 w, 523 m.  $^1\text{H}$  NMR (400 MHz, THF-*d*<sub>8</sub>):  $\delta$  7.73 (s, 1H, N=CH(Ph)), 7.27 (d, 2H, CH Ph,  $J$  = 7.8 Hz), 7.09 (m, 10H, CH Ph), 6.86 (t, 2H,

CH Napht,  $J = 6.9$  Hz), 6.72 (m, 4H, CH Ph), 6.59 (pent, 2H, CH Napht,  $J = 6.9$  Hz), 5.57 (d, 1H, CH Napht,  $J = 6.8$  Hz), 5.49 (d, 1H, CH Napht,  $J = 7.0$  Hz), 4.57 (s, 1H, N-CH(Ph)), 4.19 (sept, 1H, CH iPr,  $J = 6.6$  Hz), 3.94 (sept, 1H, CH iPr,  $J = 6.6$  Hz), 3.86 (sept, 1H, CH iPr,  $J = 6.9$  Hz), 3.78 (sept, 1H, CH iPr,  $J = 6.4$  Hz), 1.25 (d, 6H, CH<sub>3</sub> iPr,  $J = 7.0$  Hz), 1.16 (d, 3H, CH<sub>3</sub> iPr,  $J = 6.8$  Hz), 1.09 (d, 3H, CH<sub>3</sub> iPr,  $J = 5.5$  Hz), 1.01 (d, 3H, CH<sub>3</sub> iPr,  $J = 6.5$  Hz), 0.95 (d, 3H, CH<sub>3</sub> iPr,  $J = 6.5$  Hz), 0.90 (d, 3H, CH<sub>3</sub> iPr,  $J = 6.8$  Hz), 0.75 (d, 3H, CH<sub>3</sub> iPr,  $J = 6.8$  Hz). <sup>13</sup>C NMR (75 MHz, THF-*d*<sub>8</sub>):  $\delta$  147.7, 147.4, 147.3, 147.1, 146.5, 146.4, 146.1, 145.9, 145.7, 145.4, 143.8, 143.7 (C<sub>5</sub>D<sub>5</sub>N), 140.2 (CH Napht), 137.6, 132.9, 132.6, 132.3, 131.5 (H-C=N), 129.0, 128.1, 127.8, 127.5, 127.0, 126.9, 126.7, 126.2, 126.1 (CH Napht), 125.5 (C<sub>5</sub>D<sub>5</sub>N), 124.3, 124.2, 123.3, 122.9, 122.6, 121.7, 121.1, 119.0, 115.9 (CH Napht), 115.7 (CH Napht), 104.6 (C<sub>5</sub>D<sub>5</sub>N), 92.5 (C<sub>5</sub>D<sub>5</sub>N), 73.3 (H-C-N), 62.5 (C<sub>5</sub>D<sub>5</sub>N), 27.8 (CH(CH<sub>3</sub>)<sub>2</sub>), 27.6 (CH(CH<sub>3</sub>)<sub>2</sub>), 26.8 (CH(CH<sub>3</sub>)<sub>2</sub>), 26.7 (CH(CH<sub>3</sub>)<sub>2</sub>), 25.6 (CH(CH<sub>3</sub>)<sub>2</sub>), 25.5 (CH(CH<sub>3</sub>)<sub>2</sub>), 25.2 (CH(CH<sub>3</sub>)<sub>2</sub>), 24.9 (CH(CH<sub>3</sub>)<sub>2</sub>), 23.5 (CH(CH<sub>3</sub>)<sub>2</sub>), 23.4 (CH(CH<sub>3</sub>)<sub>2</sub>), 22.9 (CH(CH<sub>3</sub>)<sub>2</sub>), 22.6 (CH(CH<sub>3</sub>)<sub>2</sub>). Elemental analysis C<sub>69</sub>H<sub>87</sub>D<sub>5</sub>GaN<sub>5</sub>NaO<sub>6.5</sub> (1193.18), calc. C 69.45, H 8.18, N 5.87 %; found C 69.06, H 7.90, N 6.15 %.

### X-ray Crystal Structure Determination.

The X-ray diffraction data were collected on a Bruker D8 Quest (Mo-K $\alpha$  radiation,  $\lambda = 0.71073$  Å) (for **2-8** and **11**), an Agilent Xcalibur E (Mo-K $\alpha$  radiation,  $\lambda = 0.71073$  Å) (for **9**) and an Agilent SuperNova (Cu-K $\alpha$  radiation,  $\lambda = 1.54184$  Å) (for **10** and **12**) diffractometers, equipped with Photon (CMOS), EOS (CCD) and Atlas Sapphire S (CCD) area detectors respectively. Data collection, initial reflection indexing and refinement of the unit cell parameters were carried out with APEX3[113] and CrysAlisPro[114] programs for **2-8**, **11** and **9**, **10**, **12** correspondingly. The crystal of **4** was a non-merohedral 2-component twin with an approximately equal ratio of single-crystal domains (0.47 : 0.53). And the diffraction data for **4**, measured on the Bruker D8 Quest, were eventually treated with the CrysAlisPro software[114]. Collected diffraction data were integrated using the SAINT [115] and CrysAlisPro [114] software respectively for **2**, **3**, **5-8**, **11** and **4**, **9**, **10**, **12**. The SADABS [116,117] (for **2**, **3**, **5-8**, **11**) and SCALE3 ABSPACK algorithm [118] (for **4**, **9**, **10**, **12**) were used for absorption corrections. XABS2 within WINGX v2018.3 software [119] was additionally employed for absorption correction of **12**. All structures were solved by dual-space method using the SHELXT [120] software and refined on  $F^2_{hkl}$  with SHELXTL [121,122] (for **1-9**, **11**) and OLEX2 [123] (for **10** and **12**) packages. The structure of twinned crystal **4** was refined for two single-crystal domains with the HKLF5 instruction Non-hydrogen atoms were refined anisotropically. Hydrogen atoms were placed in calculated positions and refined in the «riding model» with  $U_{iso}(H) = 1.2U_{eq}$  ( $U_{iso}(H) = 1.5U_{eq}$  for the hydrogen atoms in CH<sub>3</sub> groups) of their parent atoms. The H(5) atom of the -NH group of the N-cyclohexylcarbamate ligand in **8** as well as the H atoms of four -CH groups in the 1,2-dibenzylidenehydrazine moieties of **11** were located from the difference Fourier synthesis of the electron density and refined isotropically. Almost all crystals of gallium complexes additionally contain solvate molecules of Et<sub>2</sub>O (**2**, **3**, **6**, **12**), pyridine (**5**), DME (**6** and **10**) and deuterated benzene (**8**), disposed either at the common or at the special positions. Most of the solvate molecules, located at the special crystallographic sites, were found to be disordered over two or more positions. Gallium complexes possess disordered molecular fragments: Me-groups in DME ligand (**3**), *cy*-Hex groups in the carbamic moiety (**5**), *i*-Pr groups in BIAN-ligand (**5**, **10**), Ph-group in Ph<sub>2</sub>CCO-ligand (**10**), whole THF(**4**), Et<sub>2</sub>O (**4**) and DME (**8**) ligands. The main crystallographic data and structure refinement details for **2 - 12** are presented in the Table S1. CCDC 2314238 (**2**), 2314239 (**3**), 2314240 (**4**), 2314241 (**5**), 2314242 (**6**), 2314245 (**7**), 2314246 (**8**), 2314247 (**9**), 2314248 (**10**), 2314249 (**11**) and 2314250 (**12**) contain the supplementary crystallographic data for this paper. These data can be obtained free of charge via [ccdc.cam.ac.uk/structures](http://ccdc.cam.ac.uk/structures)

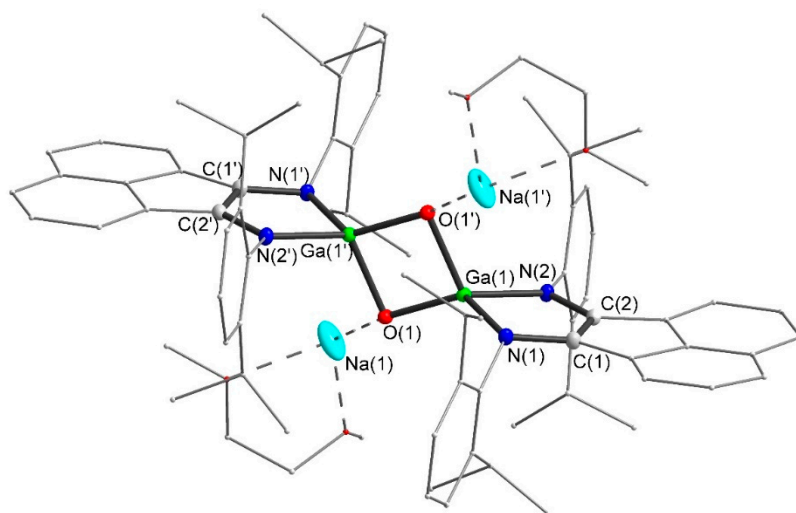

**Figure S1.** Molecular structure of compound **6**. Thermal ellipsoids are drawn at 30% probability level. Hydrogen atoms are omitted. Selected bond lengths (Å) and angles (°): Ga(1)–O(1) 1.8322(16), Ga(1)–O(1a) 1.8830(17), Ga(1)···Ga(1a) 2.6336(5), Na(1)–O(1) 2.143(2), N(1)–C(1) 1.406(3), N(2)–C(2) 1.371(3), C(1)–C(2) 1.377(3), O(1)–Ga(1)–O(1a) 89.72(7), O(1)–Ga(1)–N(2) 123.06(8), N(2)–Ga(1)–N(1) 89.99(9), Ga(1)–O(1)–Ga(1a) 90.28(7). (a) -x, 1-y, 1-z.

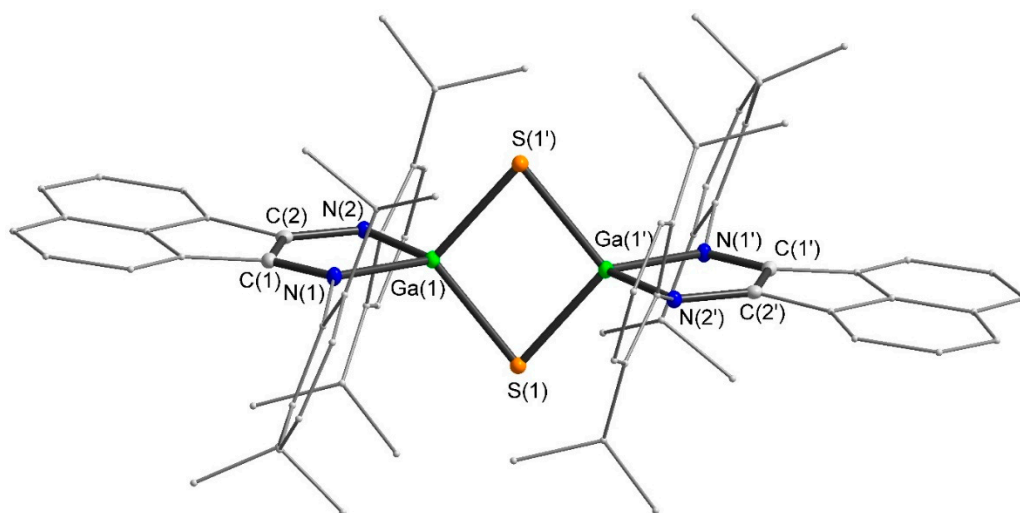

**Figure S2.** Molecular structure of compound **7**. Thermal ellipsoids are drawn at 30% probability level. Hydrogen atoms are omitted. Selected bond lengths (Å) and angles (°): Ga(1)–N(2) 1.9446(17), Ga(1)–N(1) 1.9478(16), Ga(1)–S(1) 2.2613(6), Ga(1)–S(1') 2.2630(6), Ga(1)–Ga(1') 2.9151(5), N(1)–C(1) 1.388(3), N(2)–C(2) 1.387(2), C(1)–C(2) 1.382(3), N(2)–Ga(1)–N(1) 88.06(7), N(2)–Ga(1)–S(1) 119.40(5), N(1)–Ga(1)–S(1) 117.23(5), N(2)–Ga(1)–S(1') 116.08(5), N(1)–Ga(1)–S(1') 117.68(5), S(1)–Ga(1)–S(1') 99.771(19), N(2)–Ga(1)–Ga(1') 136.23(5), N(1)–Ga(1)–Ga(1') 135.68(5), S(1)–Ga(1)–Ga(1') 49.910(15), Ga(1)–S(1)–Ga(1') 80.229(19), C(1)–N(1)–Ga(1) 107.40(12), C(2)–N(2)–Ga(1) 107.56(12), C(2)–C(1)–N(1) 118.53(17), N(2)–C(2)–C(1) 118.43(18). (a) 1-x, 1-y, 1-z.

**Table S1.** Crystallographic data and refinement details for compounds **2–12**.

| Complex              | 2×C <sub>4</sub> H <sub>10</sub> O                                              | 3×C <sub>4</sub> H <sub>10</sub> O                                                                | 4                                                                                               |
|----------------------|---------------------------------------------------------------------------------|---------------------------------------------------------------------------------------------------|-------------------------------------------------------------------------------------------------|
| Empirical formula    | C <sub>72</sub> H <sub>95</sub> Ga <sub>2</sub> N <sub>5</sub> NaO <sub>7</sub> | C <sub>124</sub> H <sub>176</sub> Ga <sub>2</sub> N <sub>10</sub> Na <sub>2</sub> O <sub>10</sub> | C <sub>102</sub> H <sub>138</sub> Ga <sub>2</sub> N <sub>6</sub> Na <sub>2</sub> O <sub>8</sub> |
| Formula weight       | 1235.23                                                                         | 2152.16                                                                                           | 1761.60                                                                                         |
| Temperature [K]      | 100(2)                                                                          | 100(2)                                                                                            | 100(2)                                                                                          |
| Crystal system       | Monoclinic                                                                      | Triclinic                                                                                         | Monoclinic                                                                                      |
| Space group          | P2 <sub>1</sub> /n                                                              | P-1                                                                                               | P2 <sub>1</sub> /n                                                                              |
| Unit cell dimensions |                                                                                 |                                                                                                   |                                                                                                 |
| a[Å]                 | 13.4074(5)                                                                      | 13.2545(5)                                                                                        | 14.924(2)                                                                                       |
| b[Å]                 | 28.9911(10)                                                                     | 15.2235(5)                                                                                        | 16.0437(19)                                                                                     |
| c[Å]                 | 17.5415(6)                                                                      | 15.2965(5)                                                                                        | 19.659(2)                                                                                       |

|                                                 |                                                |                                                |                                                |
|-------------------------------------------------|------------------------------------------------|------------------------------------------------|------------------------------------------------|
| $\alpha$ [°]                                    | 90                                             | 77.6949(12)                                    | 90                                             |
| $\beta$ [°]                                     | 93.397(2)                                      | 79.3142(13)                                    | 91.627(9)                                      |
| $\gamma$ [°]                                    | 90                                             | 77.5861(13)                                    | 90                                             |
| Volume [Å <sup>3</sup> ]                        | 6806.3(4)                                      | 2913.42(18)                                    | 4705.1(10)                                     |
| Z                                               | 4                                              | 1                                              | 2                                              |
| Calculated density [Mg/m <sup>3</sup> ]         | 1.205                                          | 1.227                                          | 1.243                                          |
| Absorption coefficient [mm <sup>-1</sup> ]      | 0.466                                          | 0.532                                          | 0.641                                          |
| F(000)                                          | 2640                                           | 1154                                           | 1880                                           |
| Crystal size [mm <sup>3</sup> ]                 | 0.704 × 0.408 × 0.284                          | 0.380 × 0.140 × 0.050                          | 0.220 × 0.140 × 0.120                          |
| $\theta$ [°]                                    | 2.091 / 28.000                                 | 2.251 / 30.507                                 | 1.639 / 25.081                                 |
| Index ranges                                    | -17 ≤ h ≤ 17,<br>-38 ≤ k ≤ 38,<br>-23 ≤ l ≤ 23 | -18 ≤ h ≤ 18,<br>-21 ≤ k ≤ 21,<br>-21 ≤ l ≤ 21 | -17 ≤ h ≤ 17,<br>-19 ≤ k ≤ 19,<br>-23 ≤ l ≤ 23 |
| Reflections collected / unique                  | 71122 / 16417                                  | 49673 / 17765                                  | 13959 / 13959                                  |
| R(int)                                          | 0.0431                                         | 0.0376                                         | 0.1516                                         |
| Data / restraints / parameters                  | 16417 / 0 / 791                                | 17765 / 6 / 699                                | 13959 / 607 / 580                              |
| S                                               | 1.029                                          | 1.031                                          | 1.028                                          |
| Final R indices [I > 2σ(I)]                     | 0.0419 / 0.0994                                | 0.0439 / 0.0919                                | 0.0767 / 0.1114                                |
| R indices (all data)                            | 0.0565 / 0.1045                                | 0.0673 / 0.0996                                | 0.1702 / 0.1271                                |
| Largest diff. peak and hole [e/Å <sup>3</sup> ] | 0.865 / -0.391                                 | 0.917 / -0.651                                 | 2.051 / -1.285                                 |

**Table S1.** *Continued.* Crystallographic data and refinement details for compounds **2–12**.

| Complex                                    | <b>5</b> ×3.5C <sub>5</sub> H <sub>5</sub> N                                | <b>6</b> ×0.4C <sub>4</sub> H <sub>10</sub> O <sub>2</sub> , 0.1C <sub>4</sub> H <sub>10</sub> O  | <b>7</b>                                                                                                        |
|--------------------------------------------|-----------------------------------------------------------------------------|---------------------------------------------------------------------------------------------------|-----------------------------------------------------------------------------------------------------------------|
| Empirical formula                          | C <sub>82.50</sub> H <sub>94.50</sub> GaN <sub>10.50</sub> NaO <sub>2</sub> | C <sub>82</sub> H <sub>105</sub> Ga <sub>2</sub> N <sub>4</sub> Na <sub>2</sub> O <sub>6.90</sub> | C <sub>112</sub> H <sub>164</sub> Ga <sub>2</sub> N <sub>4</sub> Na <sub>2</sub> O <sub>12</sub> S <sub>2</sub> |
| Formula weight                             | 1357.89                                                                     | 1442.51                                                                                           | 2008.00                                                                                                         |
| Temperature [K]                            | 100(2)                                                                      | 100(2)                                                                                            | 100(2)                                                                                                          |
| Crystal system                             | Monoclinic                                                                  | Monoclinic                                                                                        | Monoclinic                                                                                                      |
| Space group                                | P2 <sub>1</sub> /n                                                          | P2 <sub>1</sub> /c                                                                                | P2 <sub>1</sub> /n                                                                                              |
| Unit cell dimensions                       |                                                                             |                                                                                                   |                                                                                                                 |
| a [Å]                                      | 12.1435(6)                                                                  | 20.3850(7)                                                                                        | 16.8432(9)                                                                                                      |
| b [Å]                                      | 23.8032(12)                                                                 | 16.3237(6)                                                                                        | 17.154(1)                                                                                                       |
| c [Å]                                      | 25.7733(13)                                                                 | 22.9506(8)                                                                                        | 19.5039(11)                                                                                                     |
| $\alpha$ [°]                               | 90                                                                          | 90                                                                                                | 90                                                                                                              |
| $\beta$ [°]                                | 98.0683(15)                                                                 | 98.774(2)                                                                                         | 107.8082(18)                                                                                                    |
| $\gamma$ [°]                               | 90                                                                          | 90                                                                                                | 90                                                                                                              |
| Volume [Å <sup>3</sup> ]                   | 7376.1(6)                                                                   | 7547.6(5)                                                                                         | 5365.2(5)                                                                                                       |
| Z                                          | 4                                                                           | 4                                                                                                 | 2                                                                                                               |
| Calculated density [Mg/m <sup>3</sup> ]    | 1.223                                                                       | 1.269                                                                                             | 1.243                                                                                                           |
| Absorption coefficient [mm <sup>-1</sup> ] | 0.434                                                                       | 0.781                                                                                             | 0.610                                                                                                           |
| F(000)                                     | 2884                                                                        | 3057                                                                                              | 2152                                                                                                            |
| Crystal size [mm <sup>3</sup> ]            | 0.450 × 0.350 × 0.150                                                       | 0.714 × 0.666 × 0.432                                                                             | 0.420 × 0.300 × 0.250                                                                                           |
| $\theta$ [°]                               | 2.149 / 26.999                                                              | 2.187 / 27.999                                                                                    | 2.253 / 27.484                                                                                                  |
| Index ranges                               | -15 ≤ h ≤ 15,                                                               | -26 ≤ h ≤ 26,                                                                                     | -21 ≤ h ≤ 21,                                                                                                   |

|                                                     |                               |                               |                               |
|-----------------------------------------------------|-------------------------------|-------------------------------|-------------------------------|
|                                                     | -30 ≤ k ≤ 30,<br>-32 ≤ l ≤ 31 | -21 ≤ k ≤ 21,<br>-30 ≤ l ≤ 30 | -22 ≤ k ≤ 22,<br>-25 ≤ l ≤ 25 |
| Reflections collected / unique                      | 73577 / 15973                 | 88765 / 18208                 | 77211 / 12304                 |
| R(int)                                              | 0.0453                        | 0.0615                        | 0.0596                        |
| Data / restraints / parameters                      | 15973 / 118 / 969             | 18208 / 48 / 909              | 12304 / 0 / 614               |
| S                                                   | 1.068                         | 1.065                         | 1.012                         |
| Final R indices [ $I > 2\sigma(I)$ ]                | 0.0448 / 0.1179               | 0.0501 / 0.1272               | 0.0415 / 0.0816               |
| R indices (all data)                                | 0.0642 / 0.1249               | 0.0751 / 0.1362               | 0.0717 / 0.0927               |
| Largest diff. peak<br>and hole [ $e/\text{\AA}^3$ ] | 0.571 / -0.500                | 1.045 / -0.969                | 0.507 / -0.764                |

**Table S1.** *Continued.* Crystallographic data and refinement details for compounds **2–12**.

| Complex                                    | <b>8</b> ×0.5C <sub>6</sub> D <sub>6</sub>                                                      | <b>9</b>                                                          | <b>10</b> ×0.5 C <sub>4</sub> H <sub>10</sub> O <sub>2</sub>      |
|--------------------------------------------|-------------------------------------------------------------------------------------------------|-------------------------------------------------------------------|-------------------------------------------------------------------|
| Empirical formula                          | C <sub>94</sub> H <sub>122</sub> D <sub>3</sub> Ga <sub>2</sub> N <sub>5</sub> NaO <sub>9</sub> | C <sub>72</sub> H <sub>70</sub> GaN <sub>4</sub> NaO <sub>2</sub> | C <sub>78</sub> H <sub>95</sub> GaN <sub>2</sub> NaO <sub>9</sub> |
| Formula weight                             | 1634.43                                                                                         | 1116.03                                                           | 1297.26                                                           |
| Temperature [K]                            | 100(2)                                                                                          | 100(2)                                                            | 150.0(1)                                                          |
| Crystal system                             | Triclinic                                                                                       | Orthorhombic                                                      | Orthorhombic                                                      |
| Space group                                | P-1                                                                                             | Pbca                                                              | P2 <sub>1</sub> 2 <sub>1</sub> 2                                  |
| Unit cell dimensions                       |                                                                                                 |                                                                   |                                                                   |
| a[Å]                                       | 13.0597(3)                                                                                      | 21.1085(2)                                                        | 23.4172(9)                                                        |
| b[Å]                                       | 15.7763(4)                                                                                      | 19.9958(2)                                                        | 21.4504(6)                                                        |
| c[Å]                                       | 23.4757(5)                                                                                      | 27.9009(3)                                                        | 14.7410(4)                                                        |
| α[°]                                       | 90.413(1)                                                                                       | 90                                                                | 90                                                                |
| β[°]                                       | 105.982(1)                                                                                      | 90                                                                | 90                                                                |
| γ[°]                                       | 110.243(1)                                                                                      | 90                                                                | 90                                                                |
| Volume [Å <sup>3</sup> ]                   | 4334.38(18)                                                                                     | 11776.4(2)                                                        | 7404.5(4)                                                         |
| Z                                          | 2                                                                                               | 8                                                                 | 4                                                                 |
| Calculated density [Mg/m <sup>3</sup> ]    | 1.252                                                                                           | 1.259                                                             | 1.164                                                             |
| Absorption coefficient [mm <sup>-1</sup> ] | 0.686                                                                                           | 0.525                                                             | 0.999                                                             |
| F(000)                                     | 1738                                                                                            | 4704                                                              | 2764                                                              |
| Crystal size [mm <sup>3</sup> ]            | 0.360 × 0.140 × 0.130                                                                           | 0.480 × 0.370 × 0.270                                             | 0.293 × 0.165 × 0.122                                             |
| θ [°]                                      | 2.155 / 28.000                                                                                  | 3.076 / 29.999                                                    | 2.794 / 73.990                                                    |
| Index ranges                               | -17 ≤ h ≤ 17,<br>-20 ≤ k ≤ 20,<br>-31 ≤ l ≤ 31                                                  | -29 ≤ h ≤ 29,<br>-28 ≤ k ≤ 28,<br>-39 ≤ l ≤ 39                    | -28 ≤ h ≤ 29,<br>-21 ≤ k ≤ 26,<br>-18 ≤ l ≤ 18                    |
| Reflections collected / unique             | 52479 / 20879                                                                                   | 222767 / 17157                                                    | 54530 / 14762                                                     |
| R(int)                                     | 0.0251                                                                                          | 0.0739                                                            | 0.0997                                                            |
| Data / restraints / parameters             | 20879 / 260 / 1176                                                                              | 17157 / 0 / 729                                                   | 14762 / 99 / 838                                                  |
| S                                          | 1.031                                                                                           | 1.034                                                             | 1.032                                                             |
| Final R indices [ $I > 2\sigma(I)$ ]       | 0.0346 / 0.0836                                                                                 | 0.0350 / 0.0818                                                   | 0.0576 / 0.1185                                                   |



|                                                 |                 |                 |                 |
|-------------------------------------------------|-----------------|-----------------|-----------------|
| R indices (all data)                            | 0.0447 / 0.0872 | 0.0599 / 0.0885 | 0.0931 / 0.1397 |
| Absolute structure parameter                    | -               | -               | -0.015(16)      |
| Largest diff. peak and hole [e/Å <sup>3</sup> ] | 1.084 / -0.793  | 0.436 / -0.548  | 0.561 / -0.497  |

**Table S1.** *Continued.* Crystallographic data and refinement details for compounds **2–12**.

| Complex                                         | <b>11</b>                                                         | <b>12</b> ×0.5C <sub>4</sub> H <sub>10</sub> O                       |
|-------------------------------------------------|-------------------------------------------------------------------|----------------------------------------------------------------------|
| Empirical formula                               | C <sub>76</sub> H <sub>94</sub> GaN <sub>6</sub> NaO <sub>6</sub> | C <sub>69</sub> H <sub>92</sub> GaN <sub>5</sub> NaO <sub>6.50</sub> |
| Formula weight                                  | 1280.28                                                           | 1188.18                                                              |
| Temperature [K]                                 | 100(2)                                                            | 150.0(1)                                                             |
| Crystal system                                  | Monoclinic                                                        | Monoclinic                                                           |
| Space group                                     | P2 <sub>1</sub> /n                                                | P2 <sub>1</sub> /c                                                   |
| Unit cell dimensions                            |                                                                   |                                                                      |
| a[Å]                                            | 22.7378(7)                                                        | 12.7861(8)                                                           |
| b[Å]                                            | 13.6552(4)                                                        | 20.1944(11)                                                          |
| c[Å]                                            | 25.4302(8)                                                        | 25.545(2)                                                            |
| α[°]                                            | 90                                                                | 90                                                                   |
| β[°]                                            | 115.169(1)                                                        | 90.030(4)                                                            |
| γ[°]                                            | 90                                                                | 90                                                                   |
| Volume [Å <sup>3</sup> ]                        | 7146.2(4)                                                         | 6595.9(8)                                                            |
| Z                                               | 4                                                                 | 4                                                                    |
| Calculated density [Mg/m <sup>3</sup> ]         | 1.190                                                             | 1.197                                                                |
| Absorption coefficient [mm <sup>-1</sup> ]      | 0.446                                                             | 1.057                                                                |
| F(000)                                          | 2728                                                              | 2540                                                                 |
| Crystal size [mm <sup>3</sup> ]                 | 0.481 × 0.264 × 0.171                                             | 0.330 × 0.110 × 0.102                                                |
| θ [°]                                           | 2.175 / 27.999                                                    | 3.460 / 74.138                                                       |
| Index ranges                                    | -30 ≤ h ≤ 30,                                                     | -15 ≤ h ≤ 15,                                                        |
|                                                 | -18 ≤ k ≤ 18,                                                     | 0 ≤ k ≤ 24,                                                          |
|                                                 | -33 ≤ l ≤ 33                                                      | 0 ≤ l ≤ 31                                                           |
| Reflections collected / unique                  | 98236 / 17210                                                     | 12970 / 12970                                                        |
| R(int)                                          | 0.0338                                                            | 0.1165                                                               |
| Data / restraints / parameters                  | 17210 / 0 / 841                                                   | 12970 / 36 / 780                                                     |
| S                                               | 1.041                                                             | 1.100                                                                |
| Final R indices [I>2σ(I)]                       | 0.0359 / 0.0834                                                   | 0.0836 / 0.1863                                                      |
| R indices (all data)                            | 0.0478 / 0.0874                                                   | 0.1473 / 0.2455                                                      |
| Largest diff. peak and hole [e/Å <sup>3</sup> ] | 0.541 / -0.326                                                    | 0.639 / -0.666                                                       |

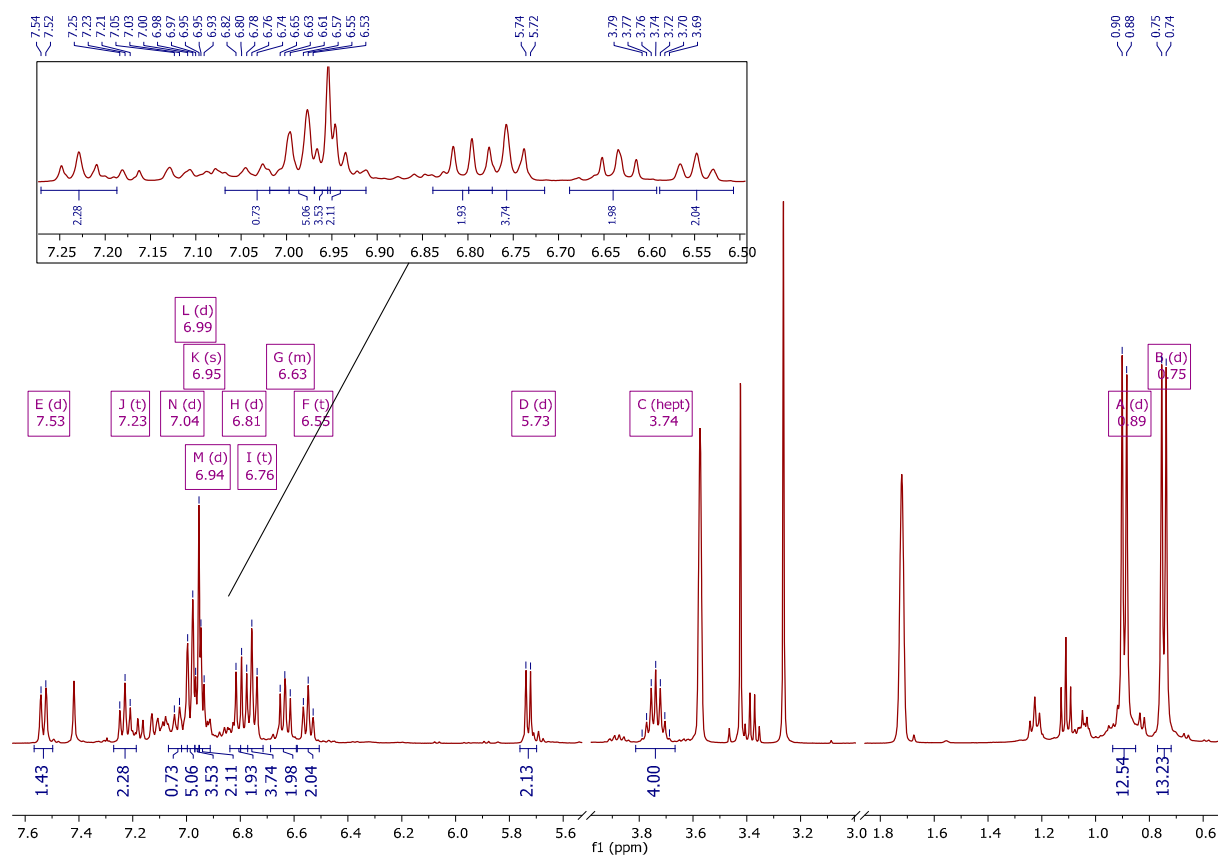

Figure S3. Selected area of  $^1\text{H}$  NMR spectrum of compound **2** in  $\text{THF-}d_8$ .

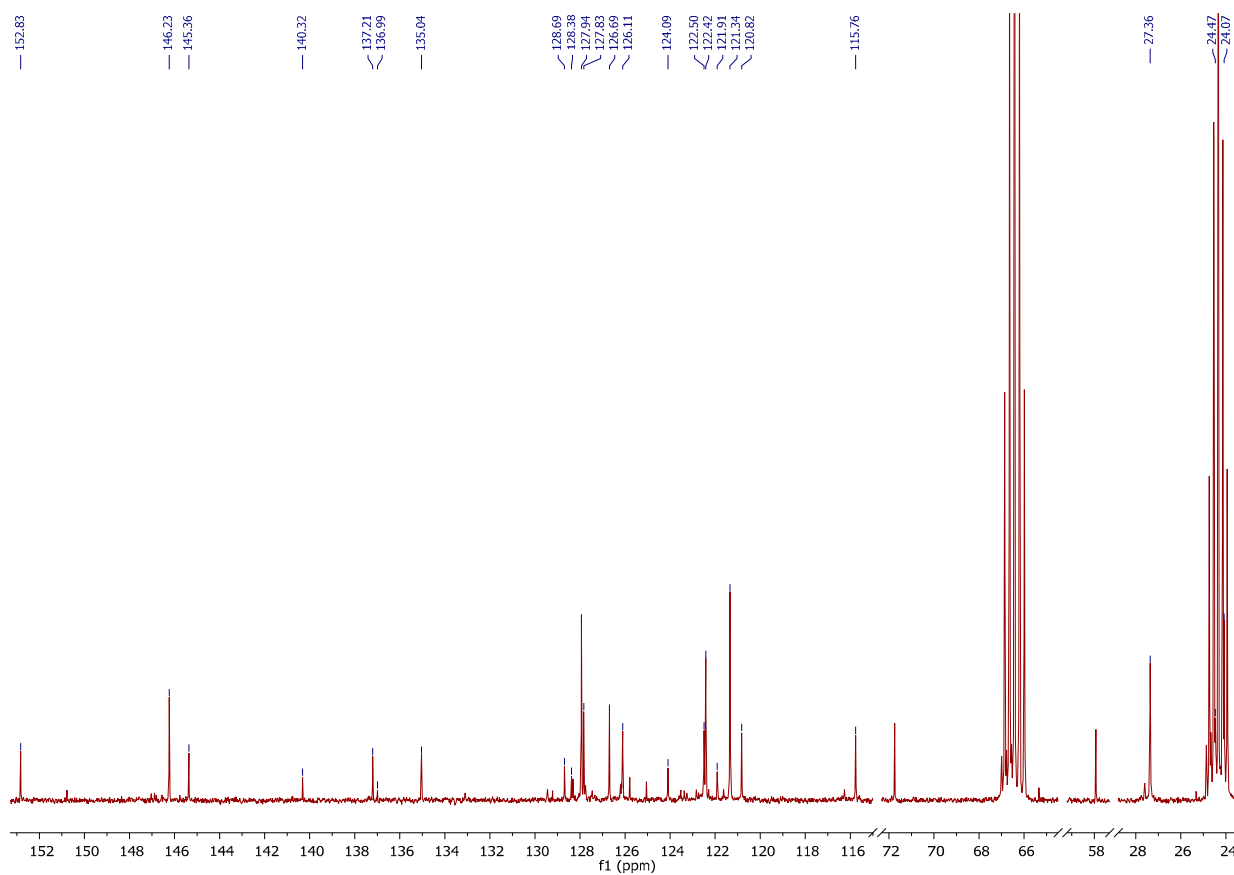

Figure S4. Selected area of  $^{13}\text{C}$  NMR spectrum of compound **2** in  $\text{THF-}d_8$ .

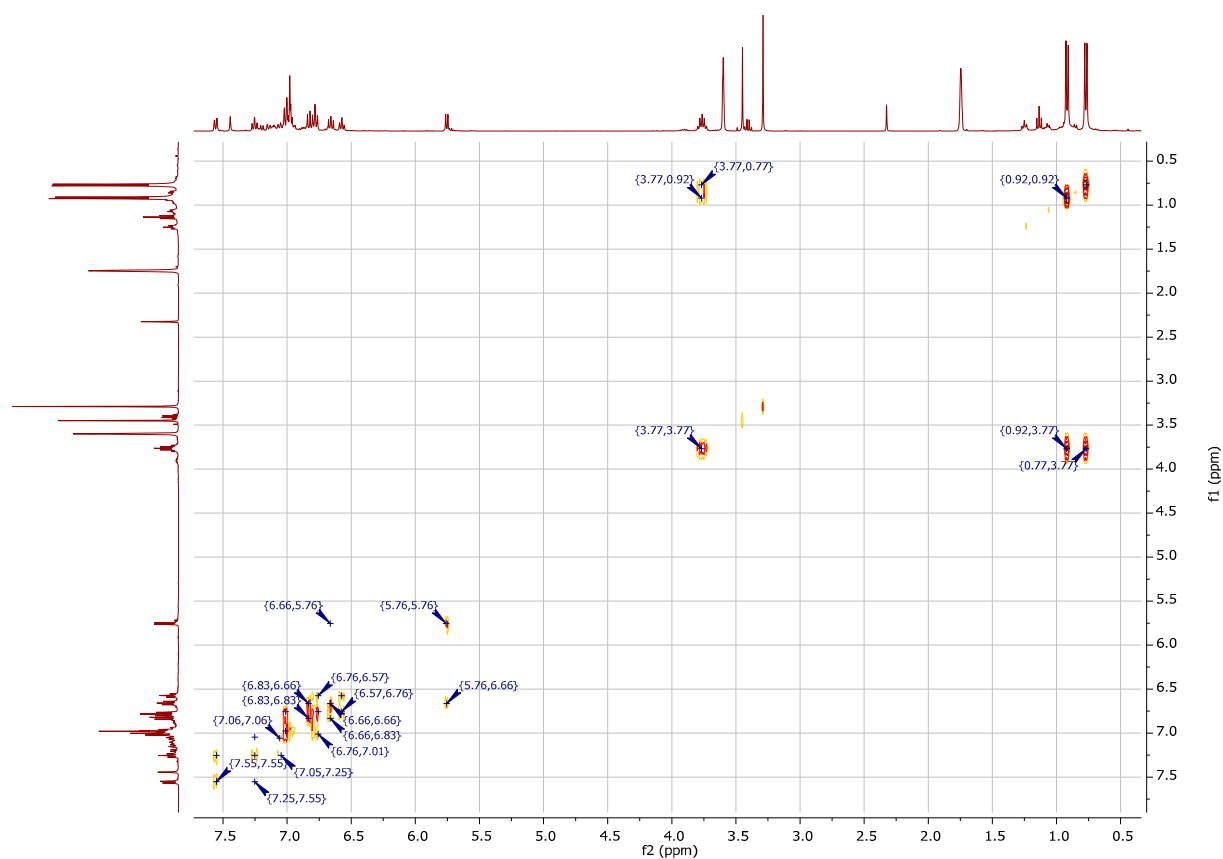

Figure S5.  $^1\text{H}$ - $^1\text{H}$  COSY NMR spectrum of compound **2** in  $\text{THF-}d_8$ .

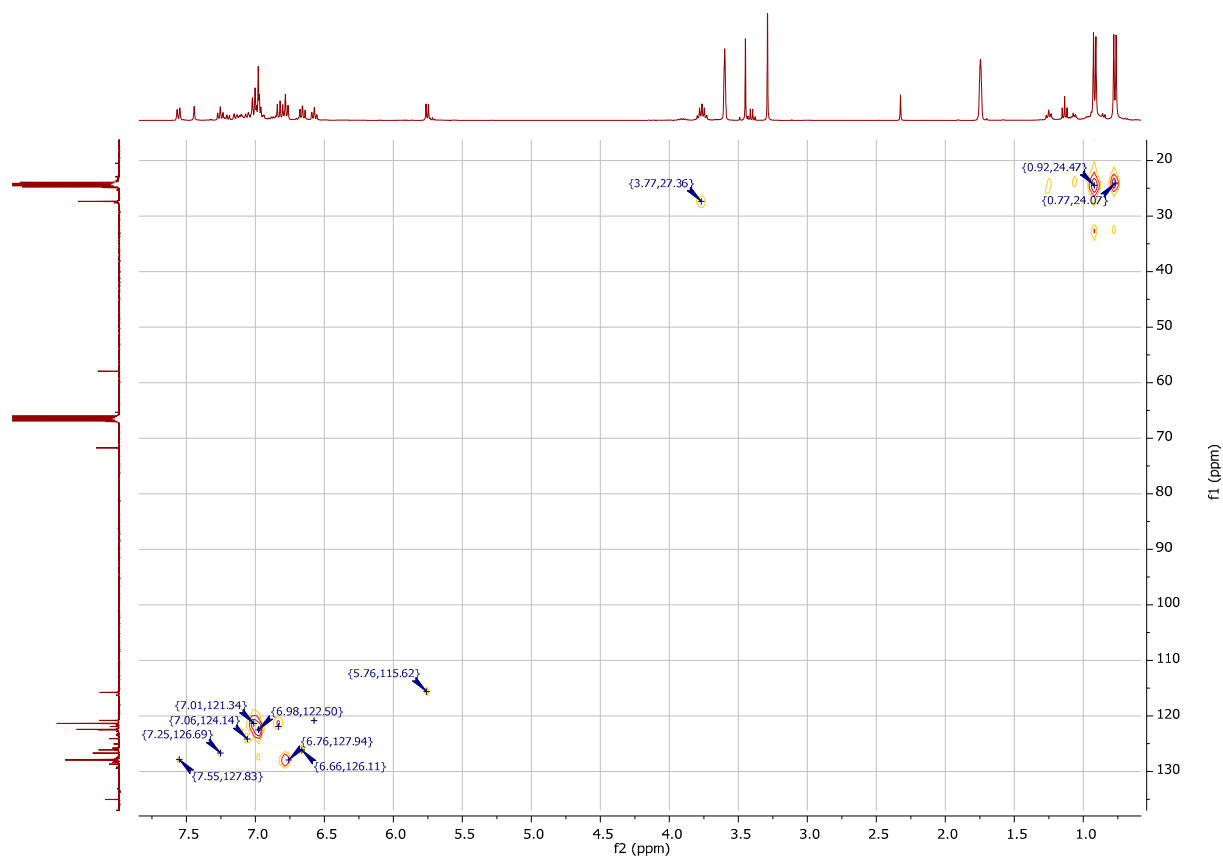

Figure S6.  $^1\text{H}$ - $^{13}\text{C}$  HSQC NMR spectrum of compound **2** in  $\text{THF-}d_8$ .

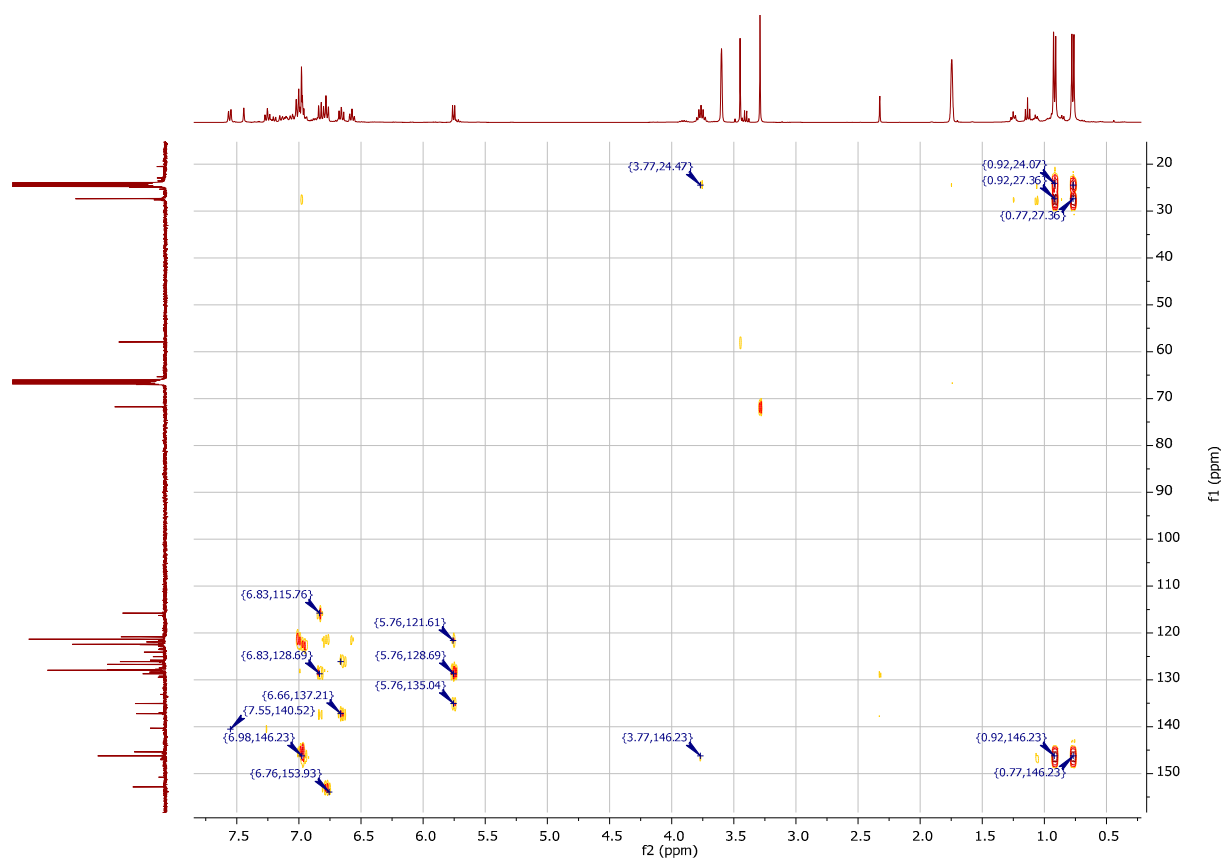

Figure S7.  $^1\text{H}$ - $^{13}\text{C}$  HMBC NMR spectrum of compound 2 in  $\text{THF-d}_8$ .

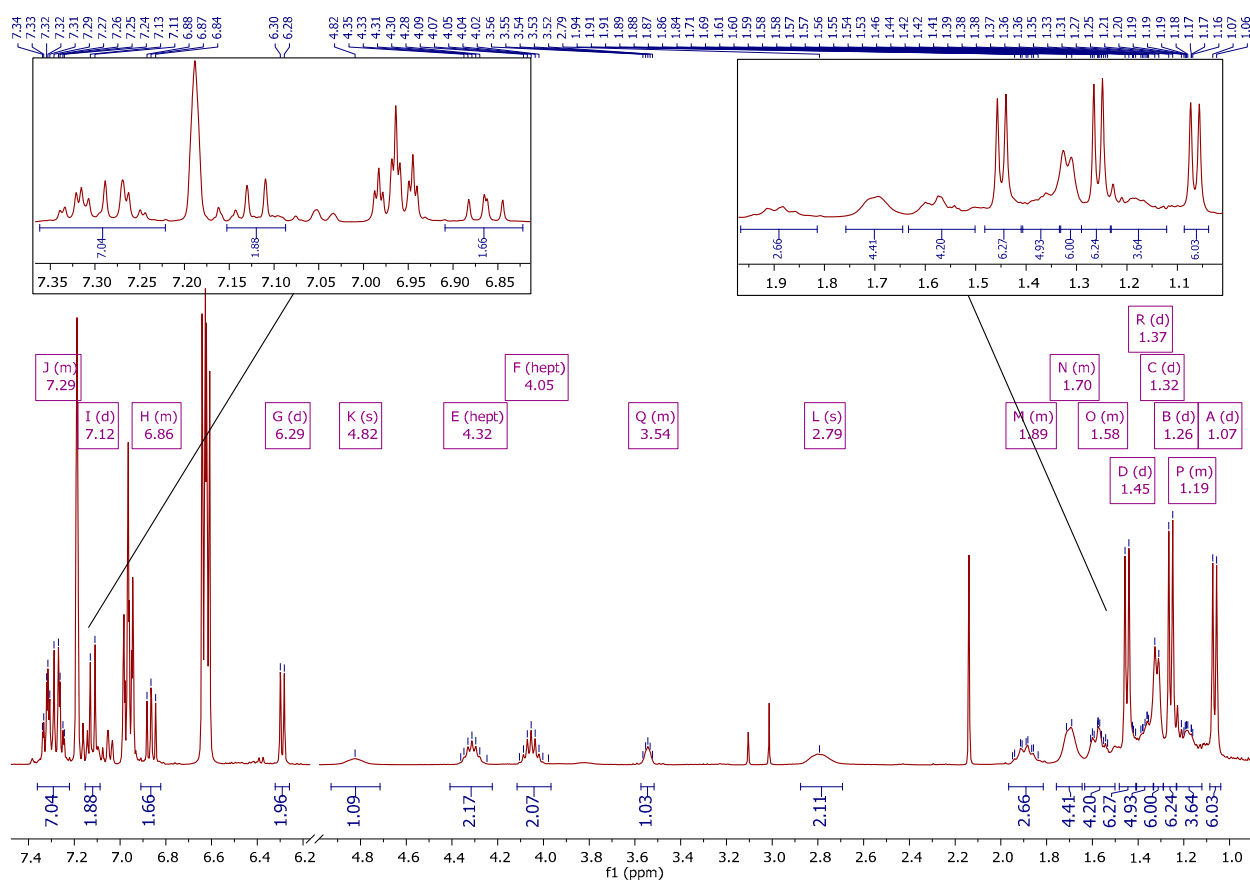

Figure S8.  $^1\text{H}$  NMR spectrum of compound 5 in  $\text{C}_6\text{D}_6$ .

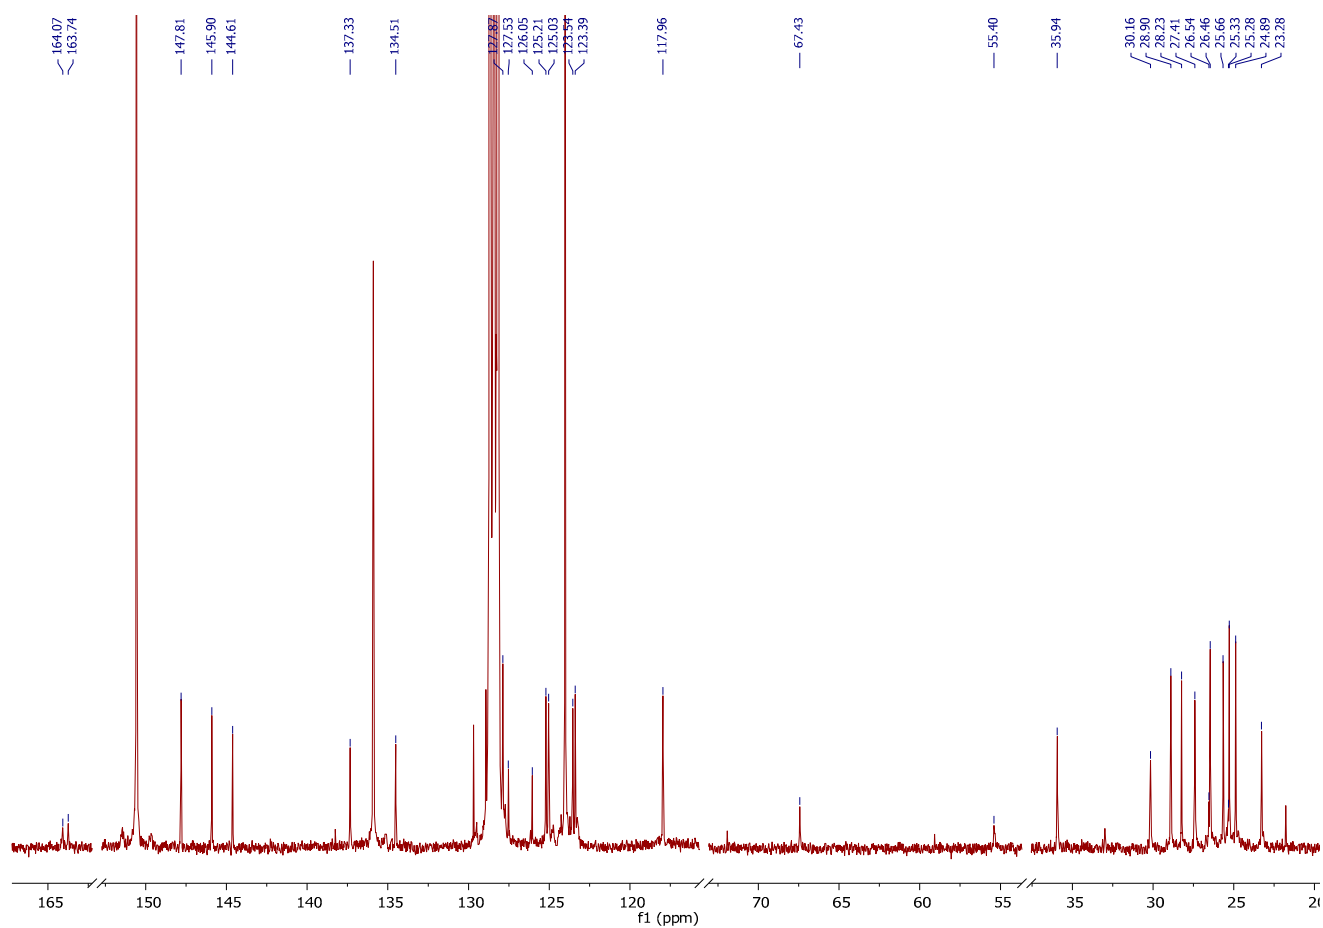

Figure S9. Selected area of  $^{13}\text{C}$  NMR spectrum of compound **5** in  $\text{C}_6\text{D}_6$ .

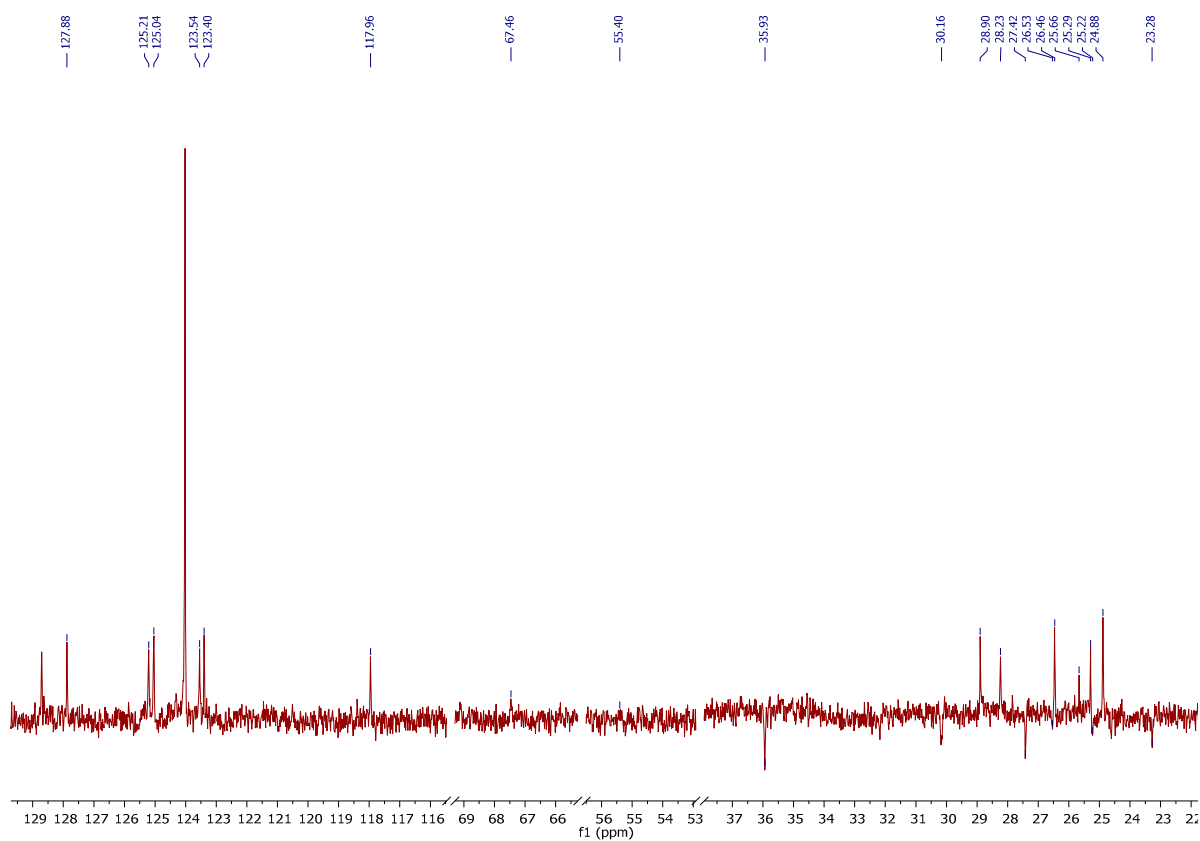

Figure S10. Selected area of DEPT135 NMR spectrum of compound **5** in  $\text{C}_6\text{D}_6$ .

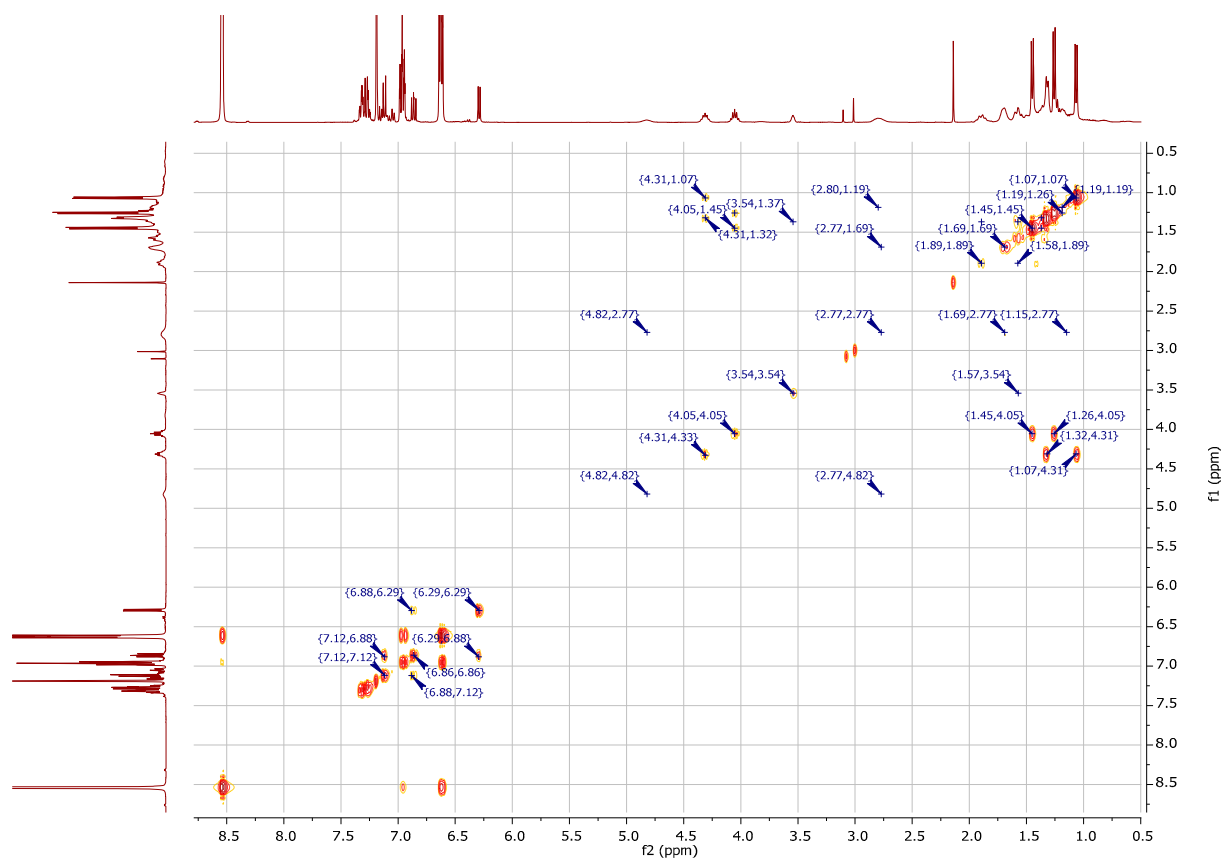

Figure S11.  $^1\text{H}$ - $^1\text{H}$  COSY NMR spectrum of compound 5 in  $\text{C}_6\text{D}_6$ .

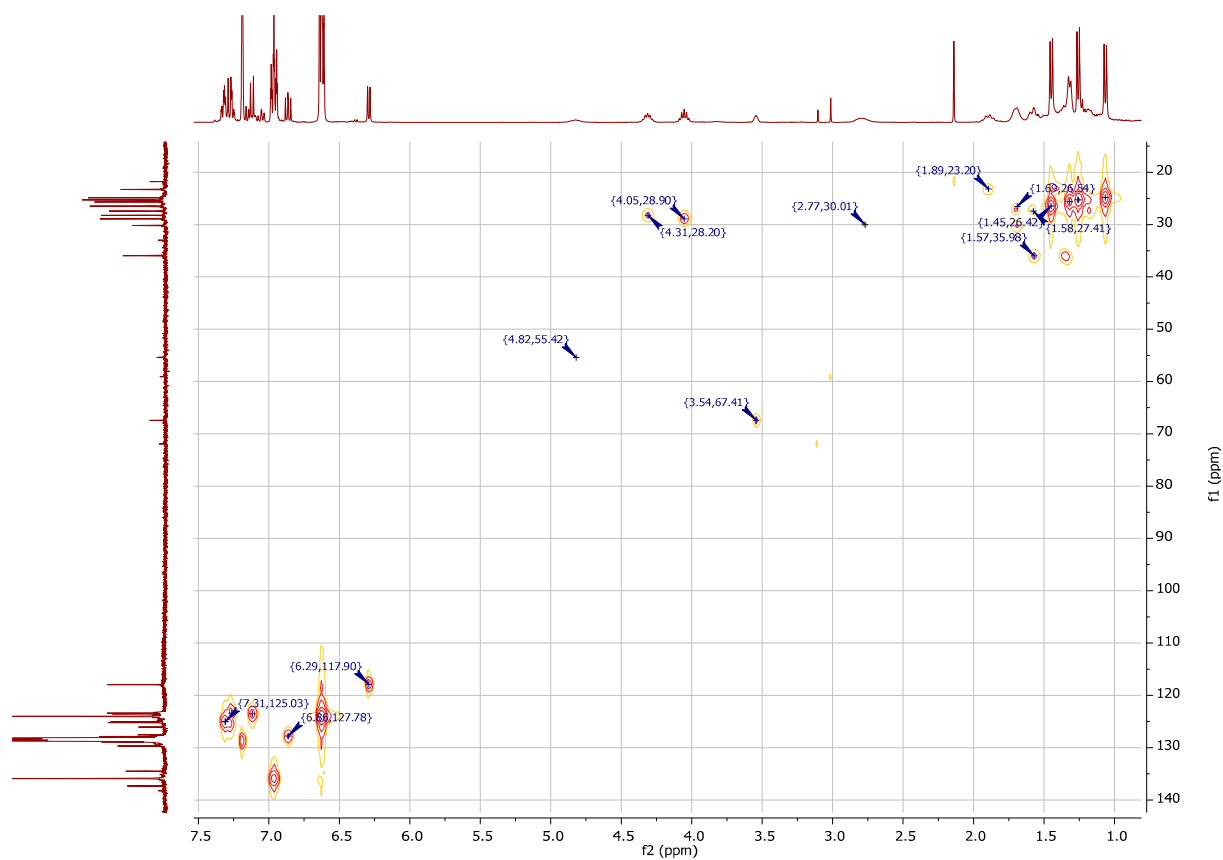

Figure S12.  $^1\text{H}$ - $^{13}\text{C}$  HSQC NMR spectrum of compound 5 in  $\text{C}_6\text{D}_6$ .

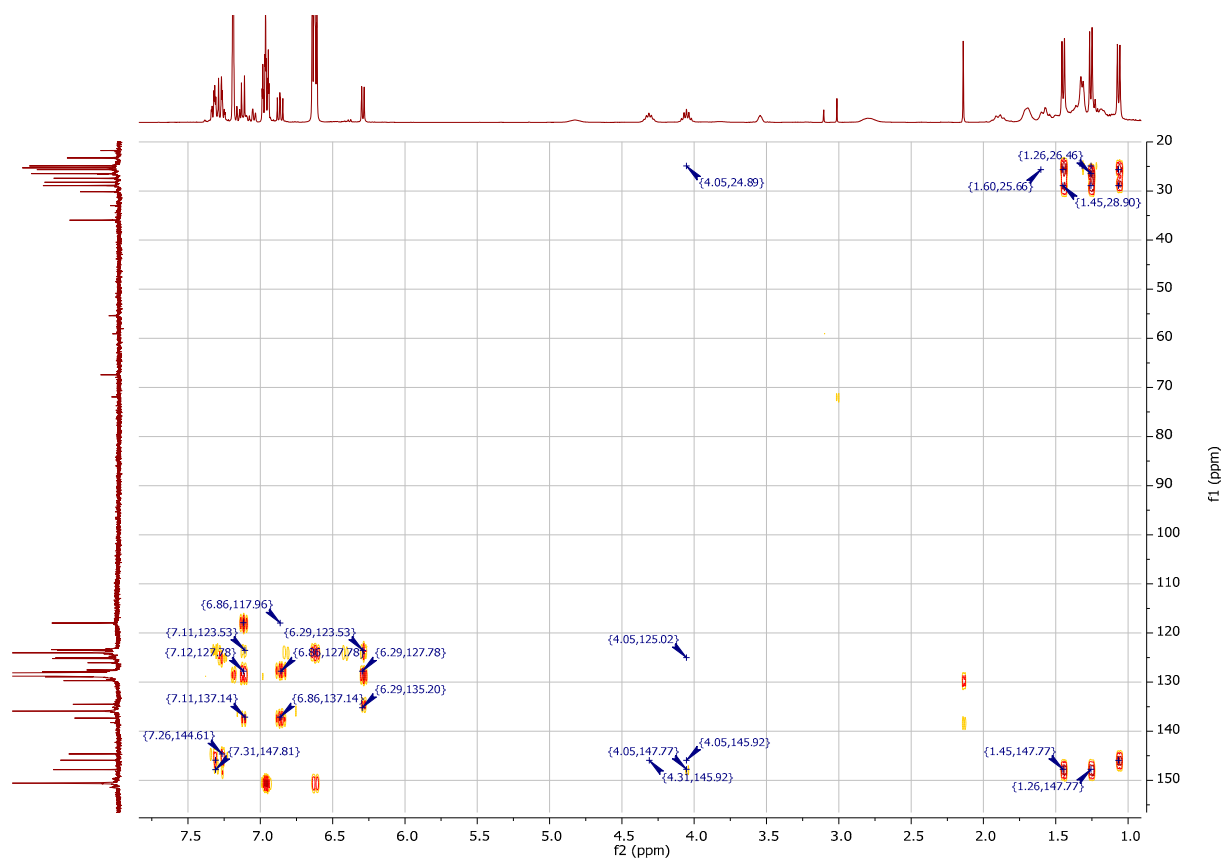

Figure S13.  $^1\text{H}$ - $^{13}\text{C}$  HMBC NMR spectrum of compound 5 in  $\text{C}_6\text{D}_6$ .

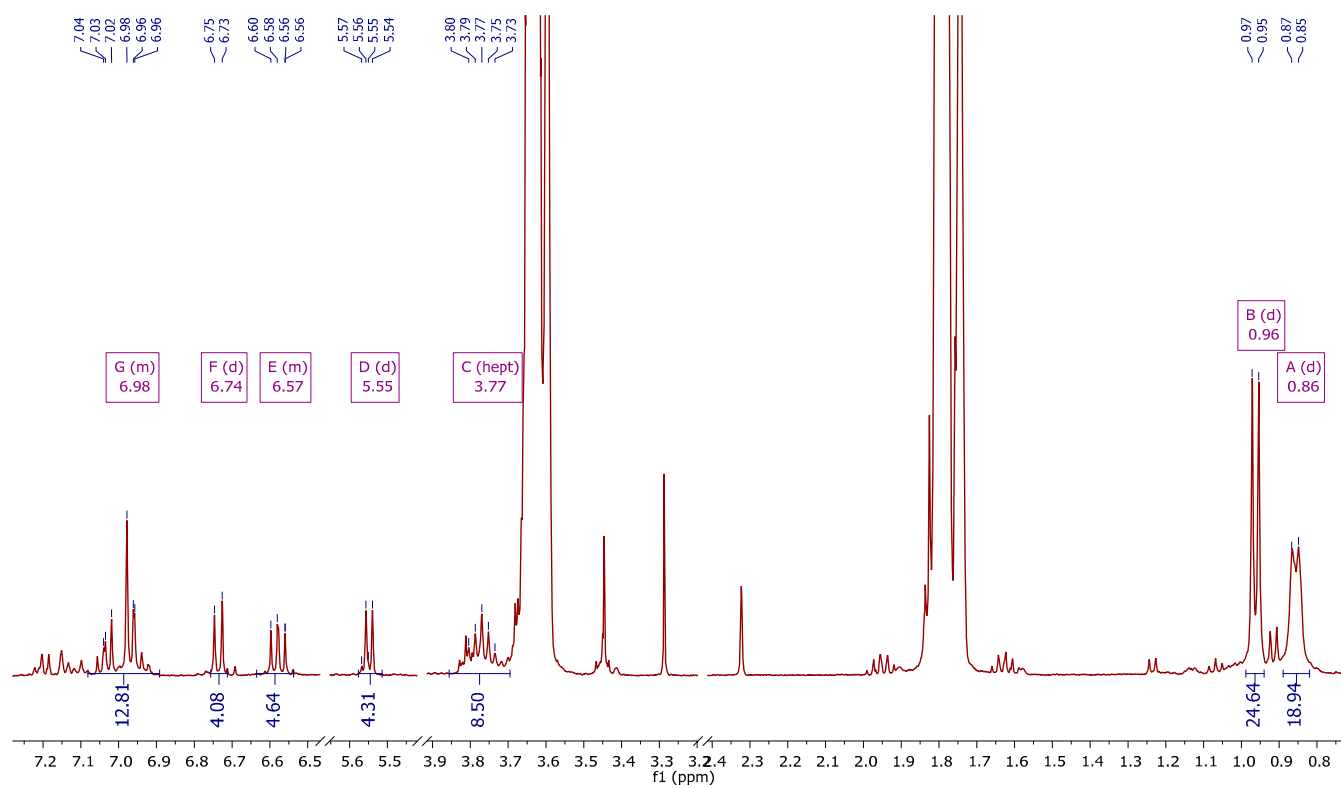

Figure S14. Selected area of  $^1\text{H}$  NMR spectrum of compound 6 in  $\text{THF-}d_8$ .

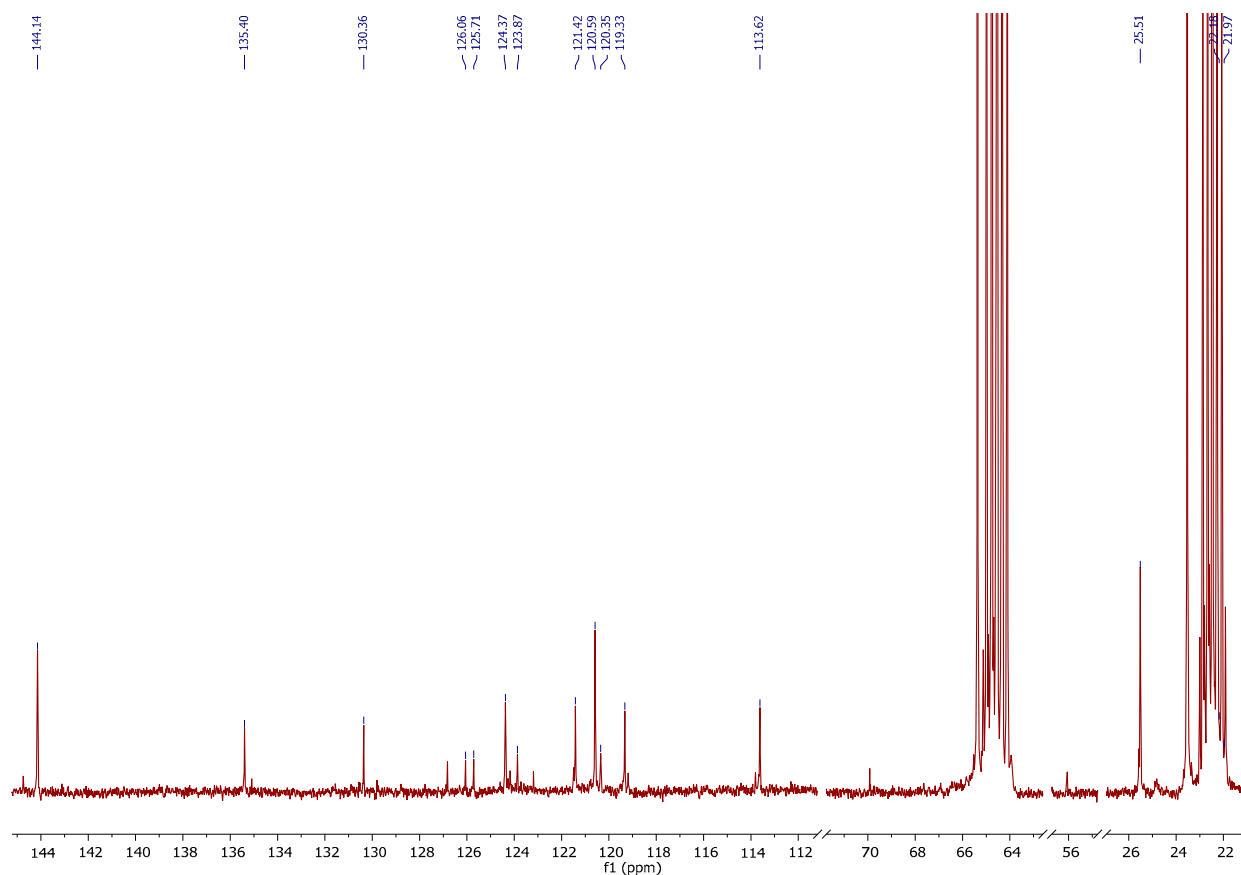

Figure S15. Selected area of  $^{13}\text{C}$  NMR spectrum of compound **6** in  $\text{THF-}d_8$ .

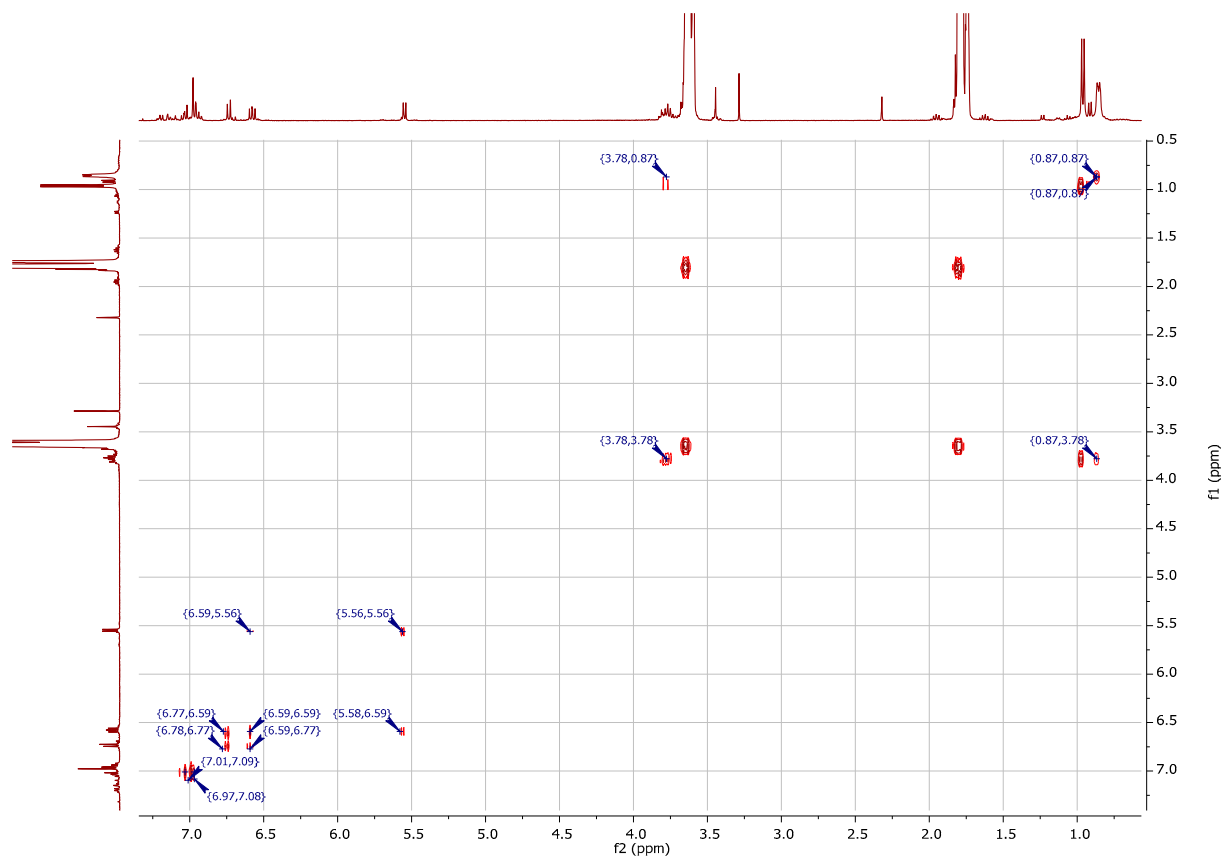

Figure S16.  $^1\text{H}$ - $^1\text{H}$  COSY NMR spectrum of compound **6** in  $\text{THF-}d_8$ .



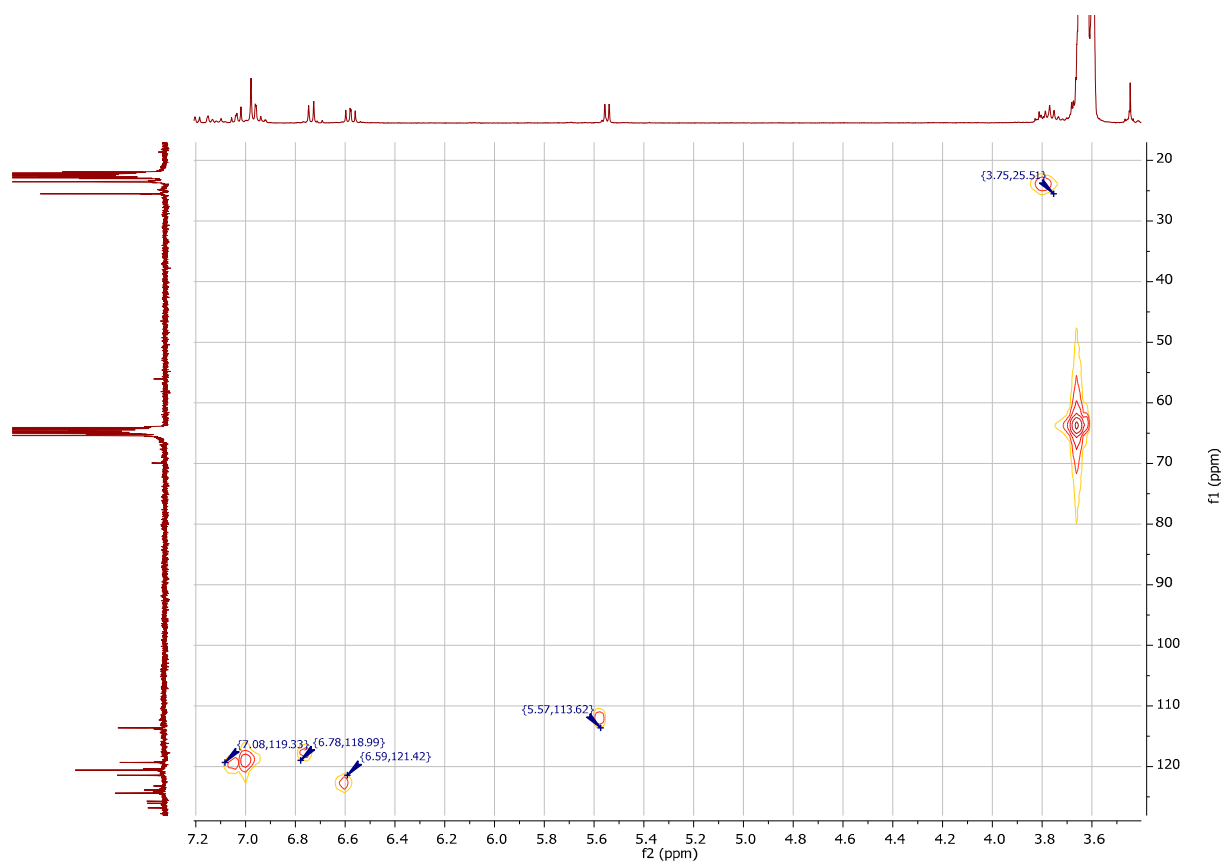

Figure S17.  $^1\text{H}$ - $^{13}\text{C}$  HSQC NMR spectrum of compound **6** in  $\text{THF-d}_8$ .

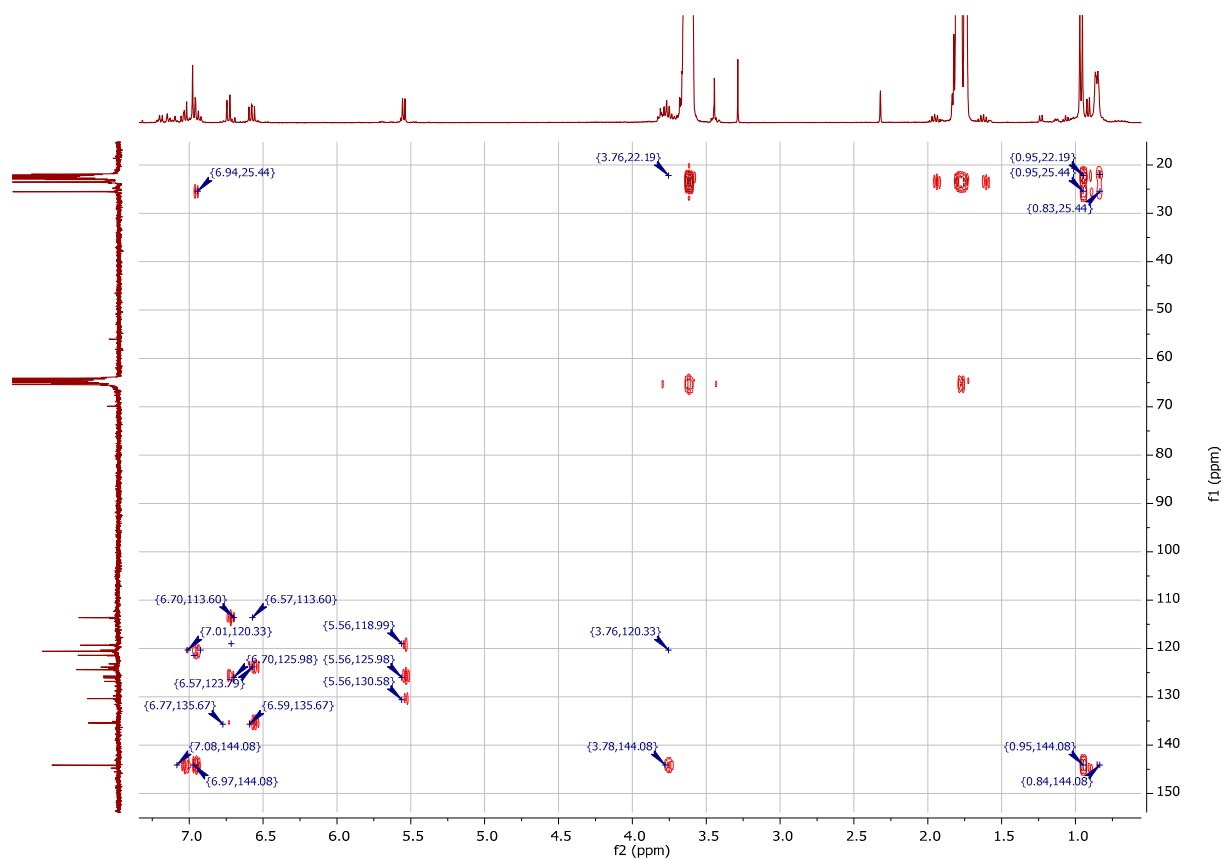

Figure S18.  $^1\text{H}$ - $^{13}\text{C}$  HMBC NMR spectrum of compound **6** in  $\text{THF-d}_8$ .

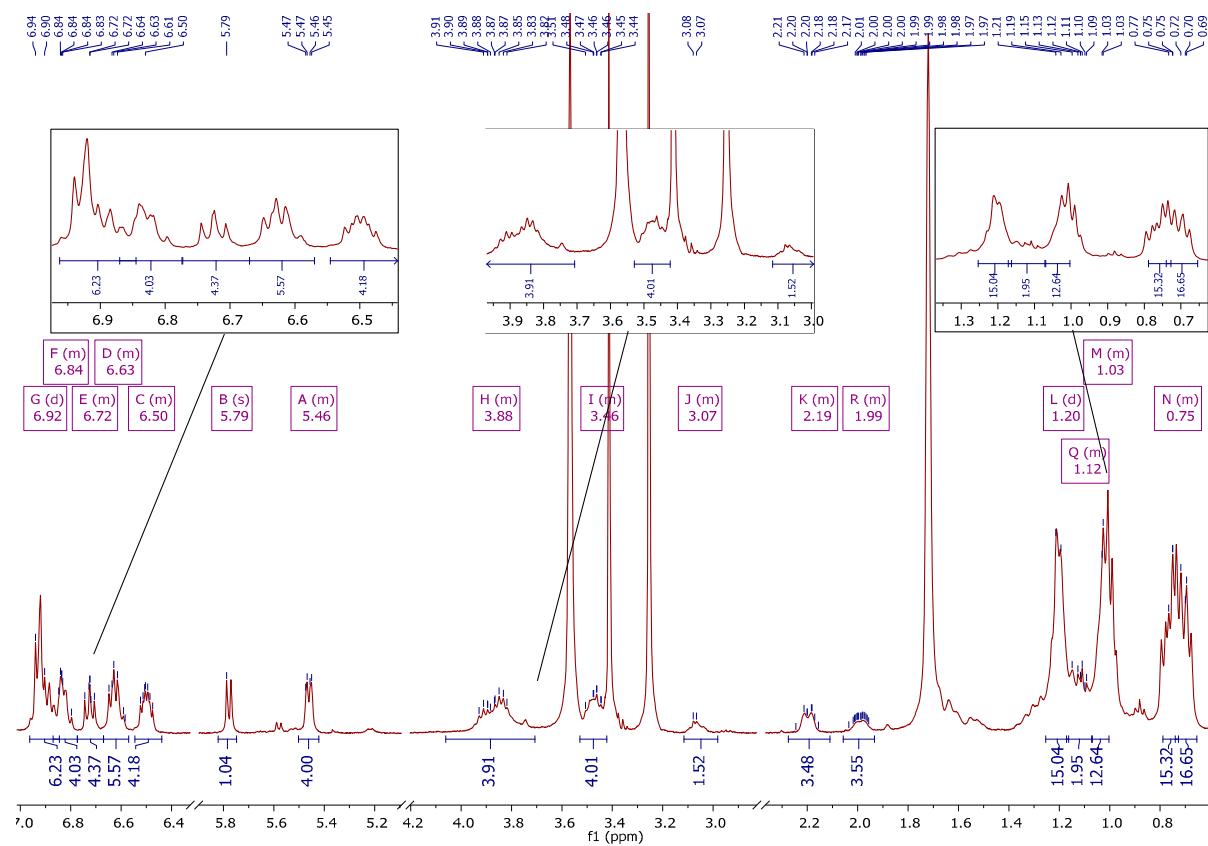

Figure S19.  $^1\text{H}$  NMR spectrum of compound **8** in  $\text{THF-}d_8$ .

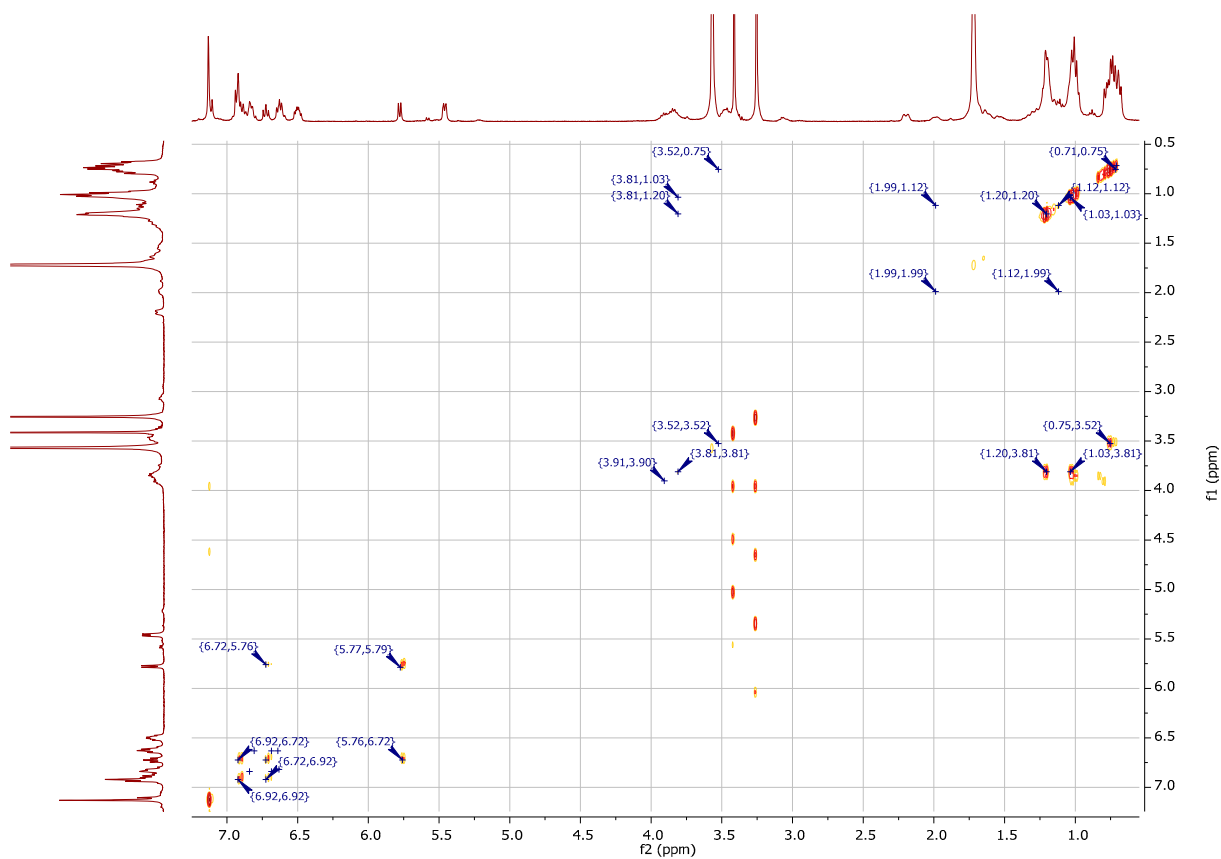

Figure S20.  $^1\text{H}$ - $^1\text{H}$  COSY NMR spectrum of compound **8** in  $\text{THF-}d_8$ .

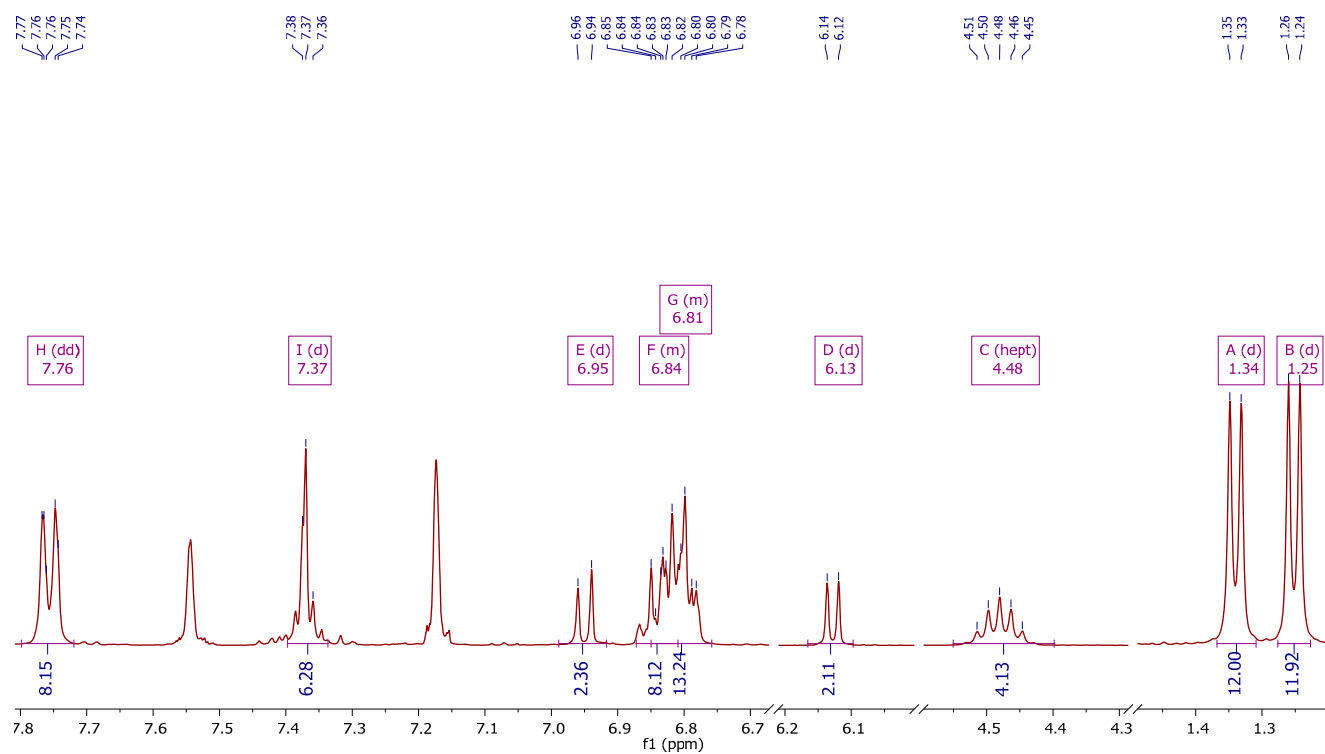

Figure S21. Selected area of  $^1\text{H}$  NMR spectrum of compound **9** in Pyridine- $d_5$ .

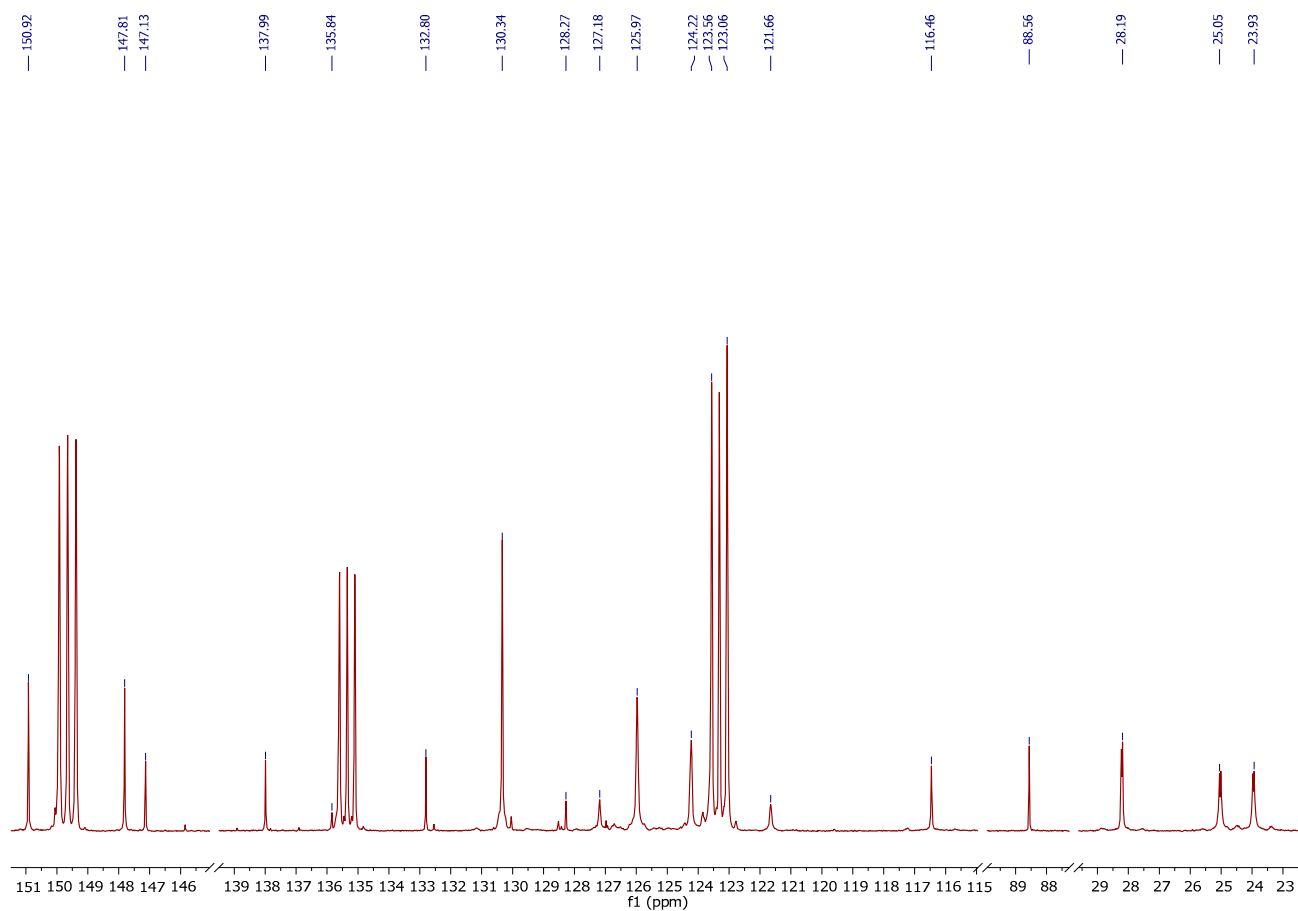

Figure S22. Selected area of  $^{13}\text{C}$  NMR spectrum of compound **9** in Pyridine- $d_5$ .

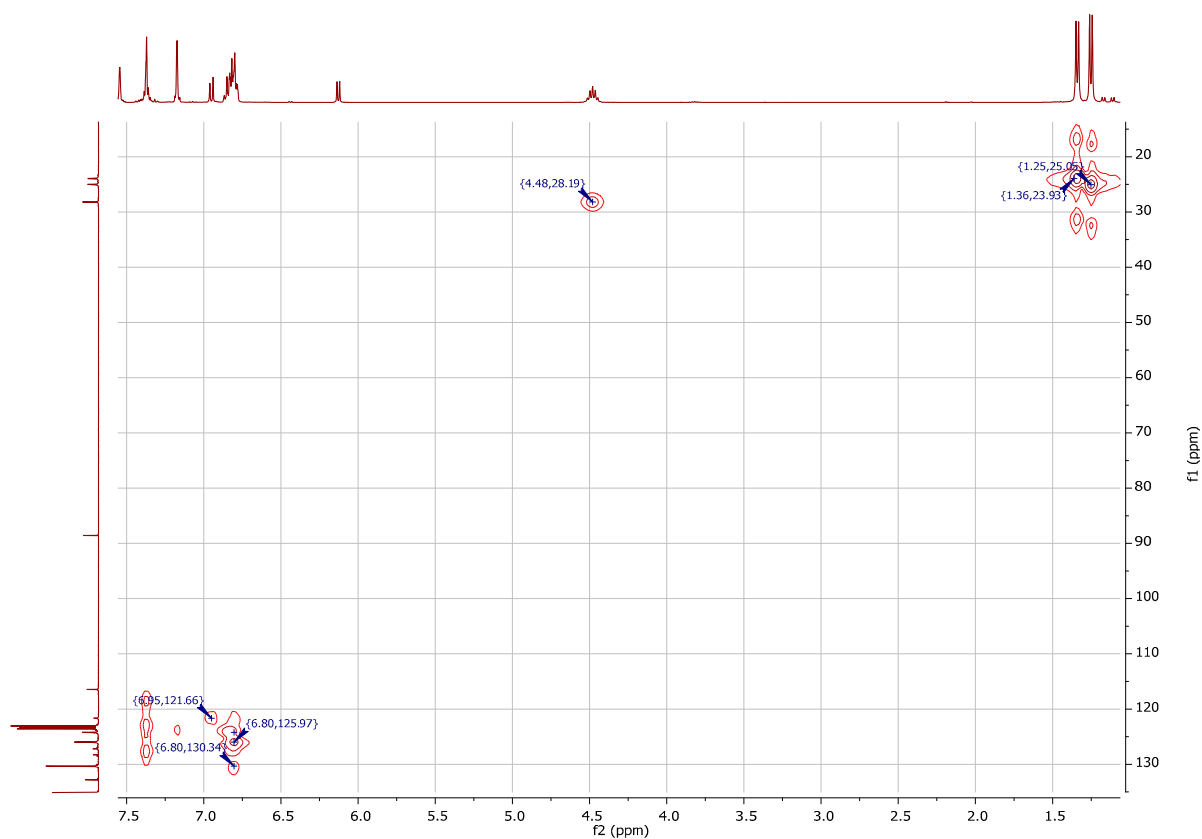

Figure S23.  $^1\text{H}$ - $^{13}\text{C}$  HSQC NMR spectrum of compound **9** in Pyridine- $d_5$ .

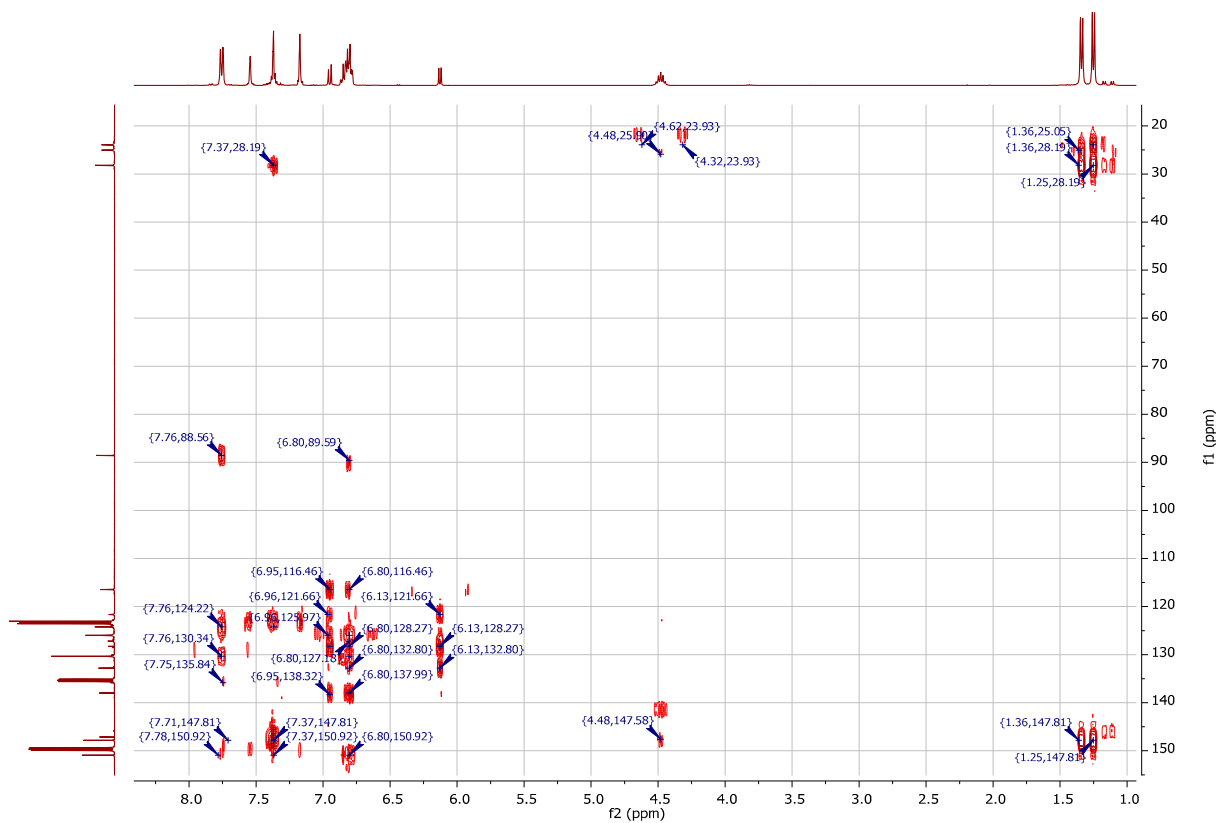

Figure S24.  $^1\text{H}$ - $^{13}\text{C}$  HMBC NMR spectrum of compound **9** in Pyridine- $d_5$ .

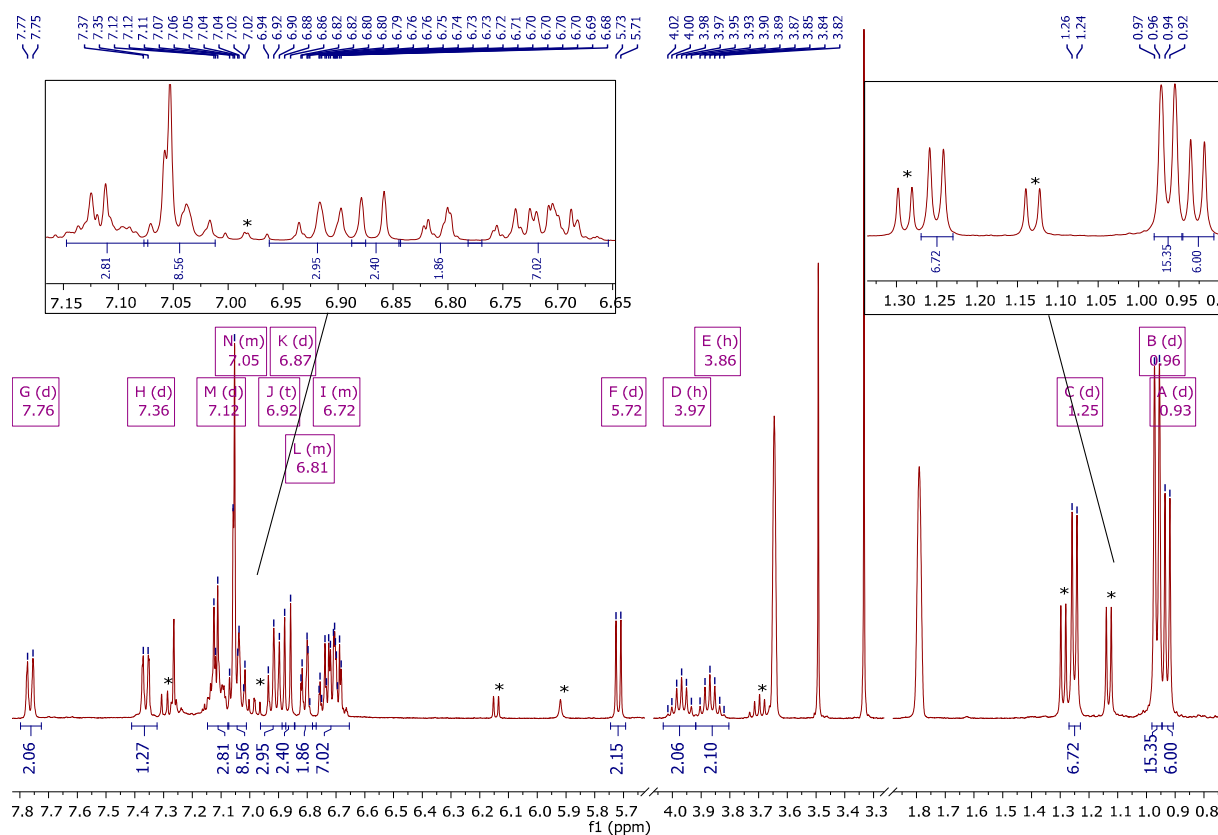

Figure S25. Selected area of  $^1\text{H}$  NMR spectrum of compound 10 in THF- $d_8$ .

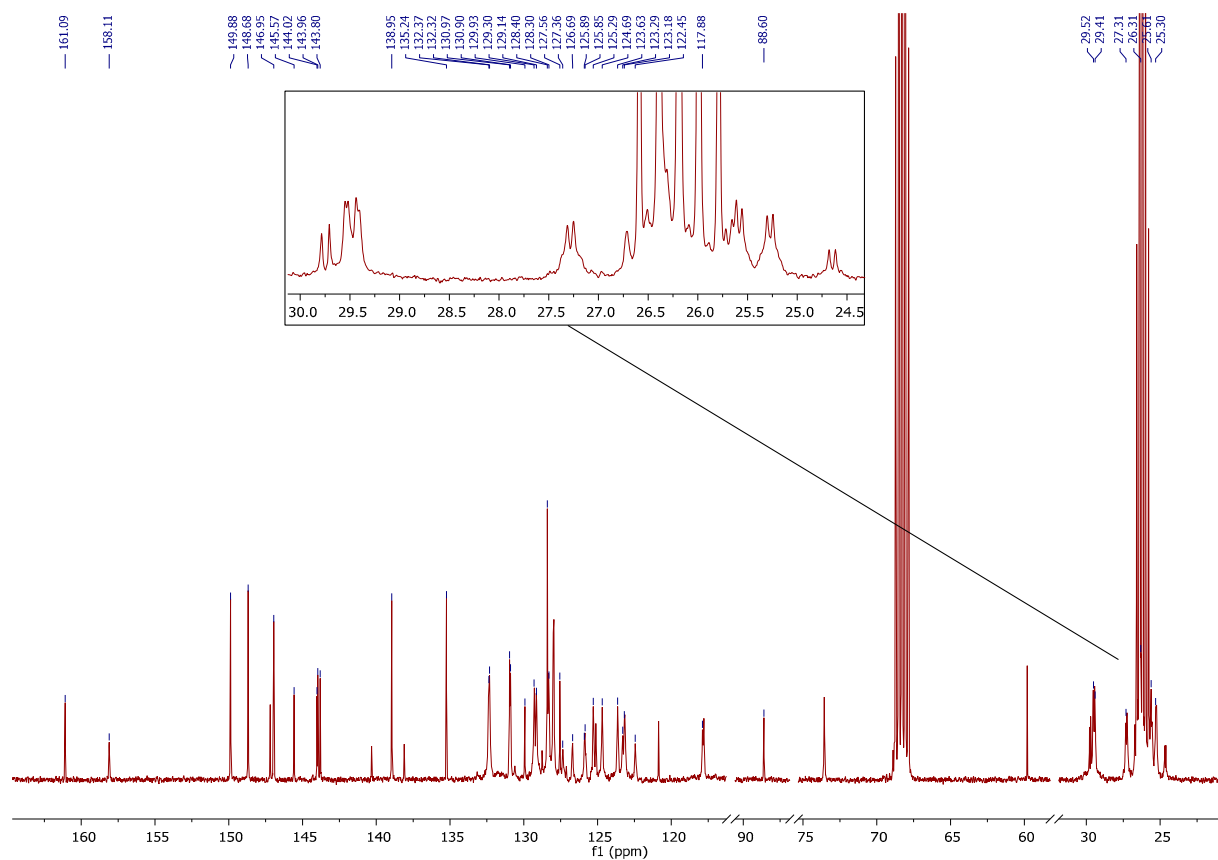

Figure S26. Selected area of  $^{13}\text{C}$  NMR spectrum of compound 10 in THF- $d_8$ .

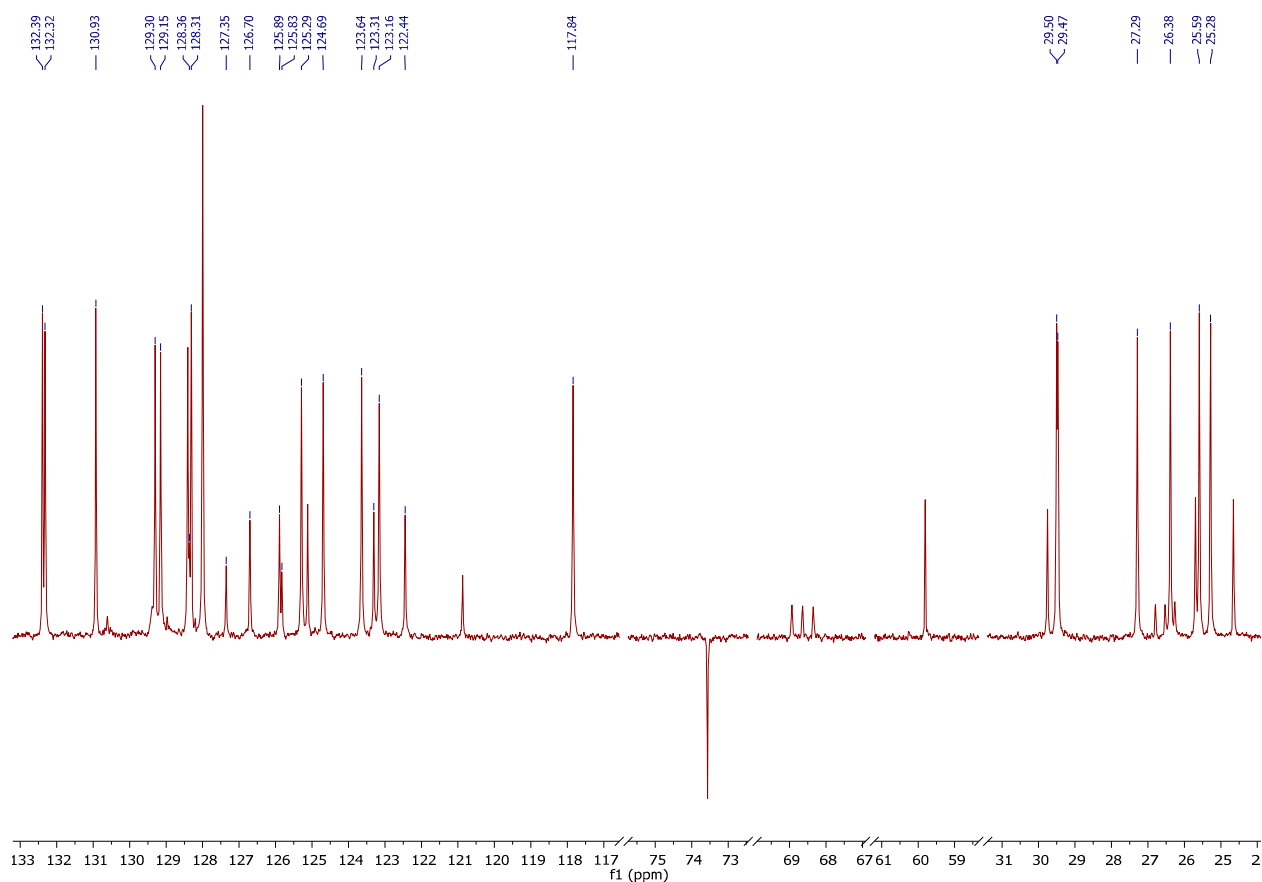

Figure S27. Selected area of DEPT135 NMR spectrum of compound **10** in THF-*d*<sub>8</sub>.

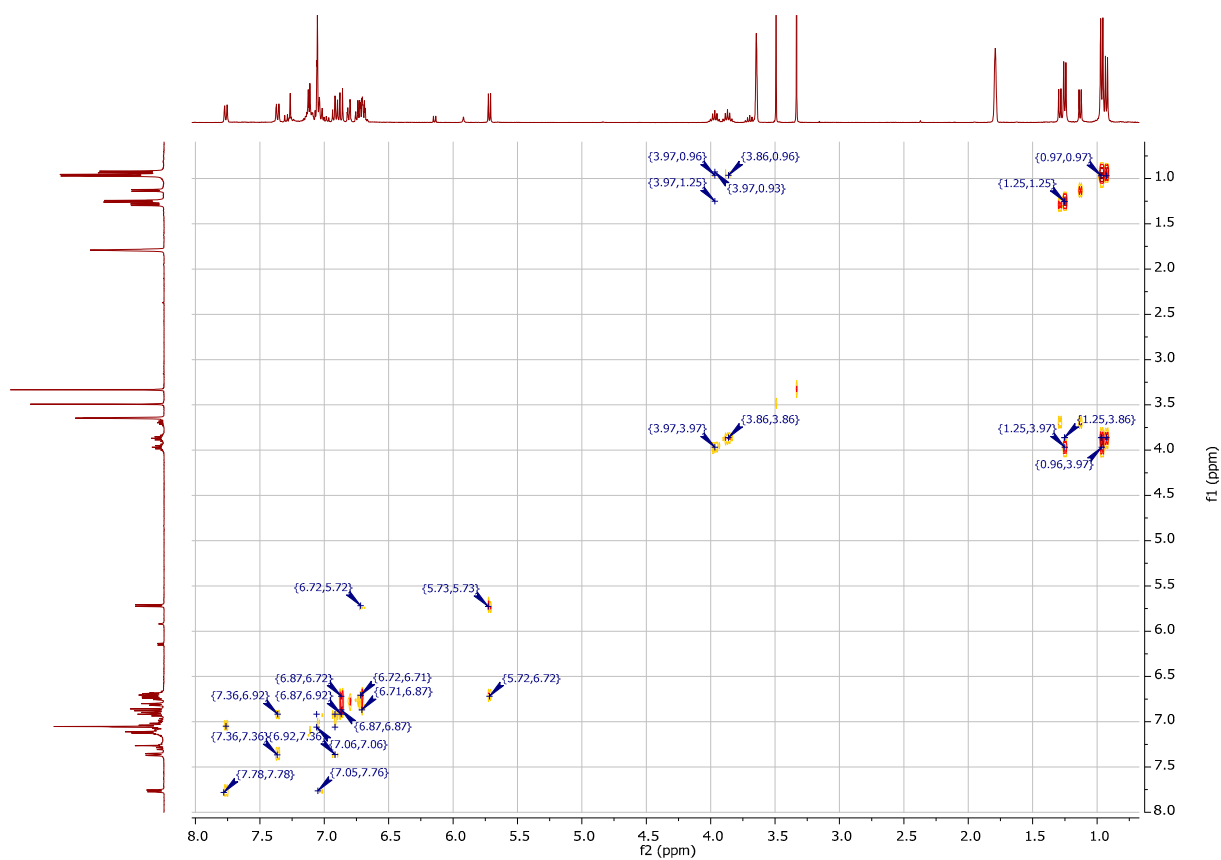

Figure S28. <sup>1</sup>H-<sup>1</sup>H COSY NMR spectrum of compound **10** in THF-*d*<sub>8</sub>.

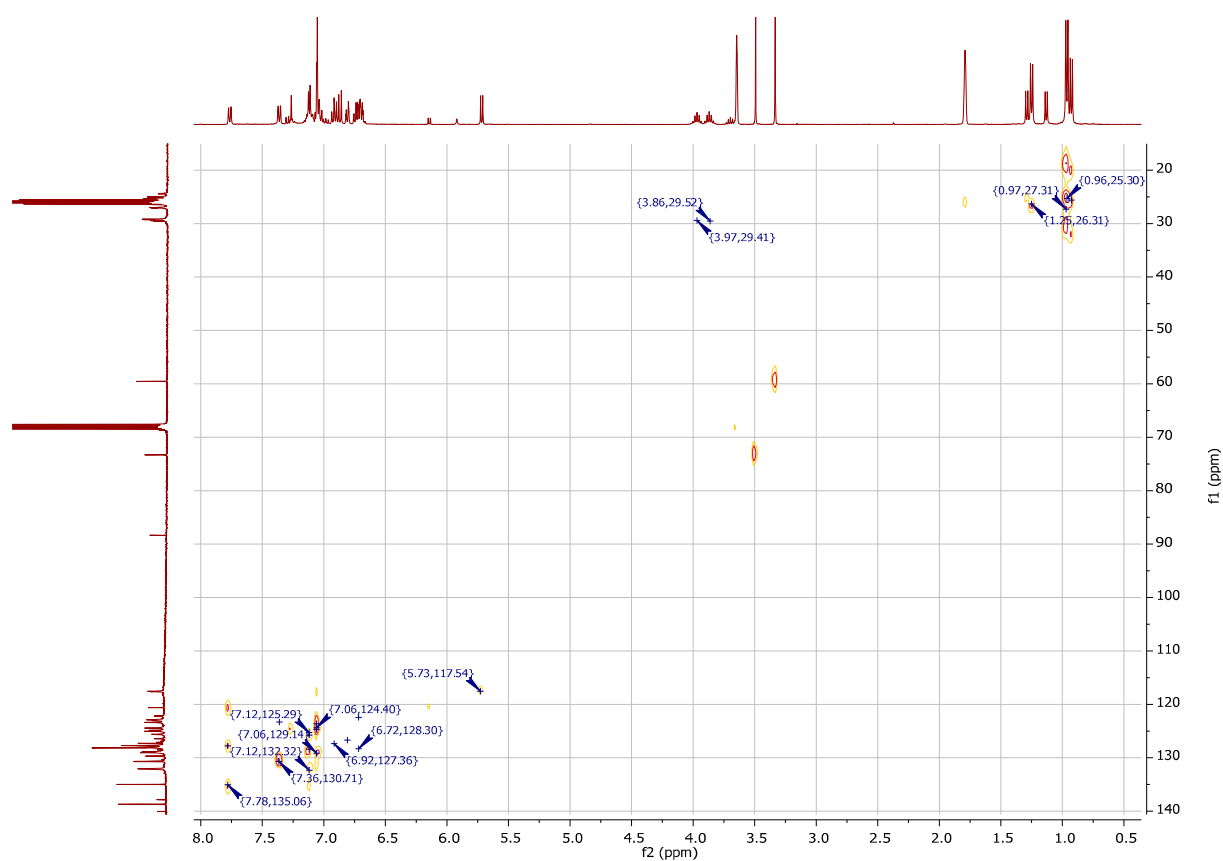

Figure S29.  $^1\text{H}$ - $^{13}\text{C}$  HSQC NMR spectrum of compound **10** in  $\text{THF-}d_8$ .

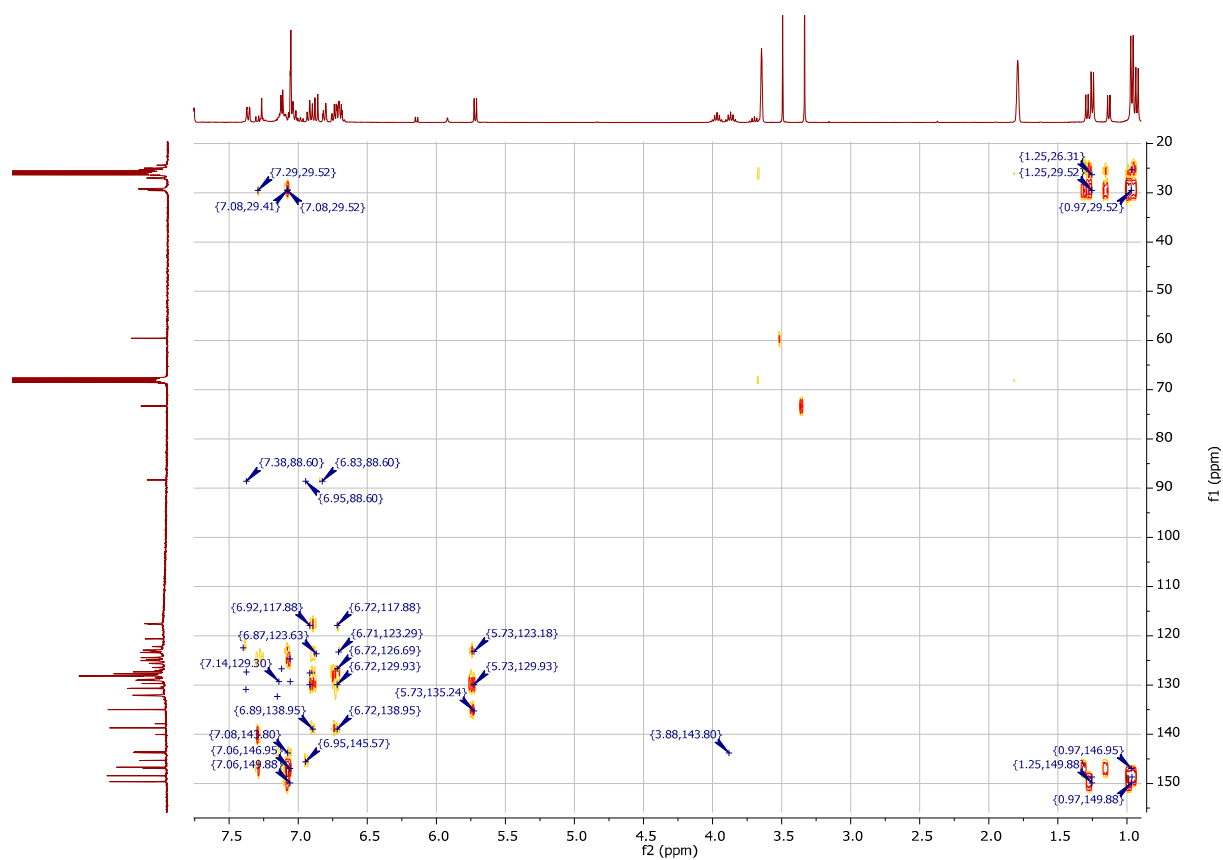

Figure S30.  $^1\text{H}$ - $^{13}\text{C}$  HMBC NMR spectrum of compound **10** in  $\text{THF-}d_8$ .

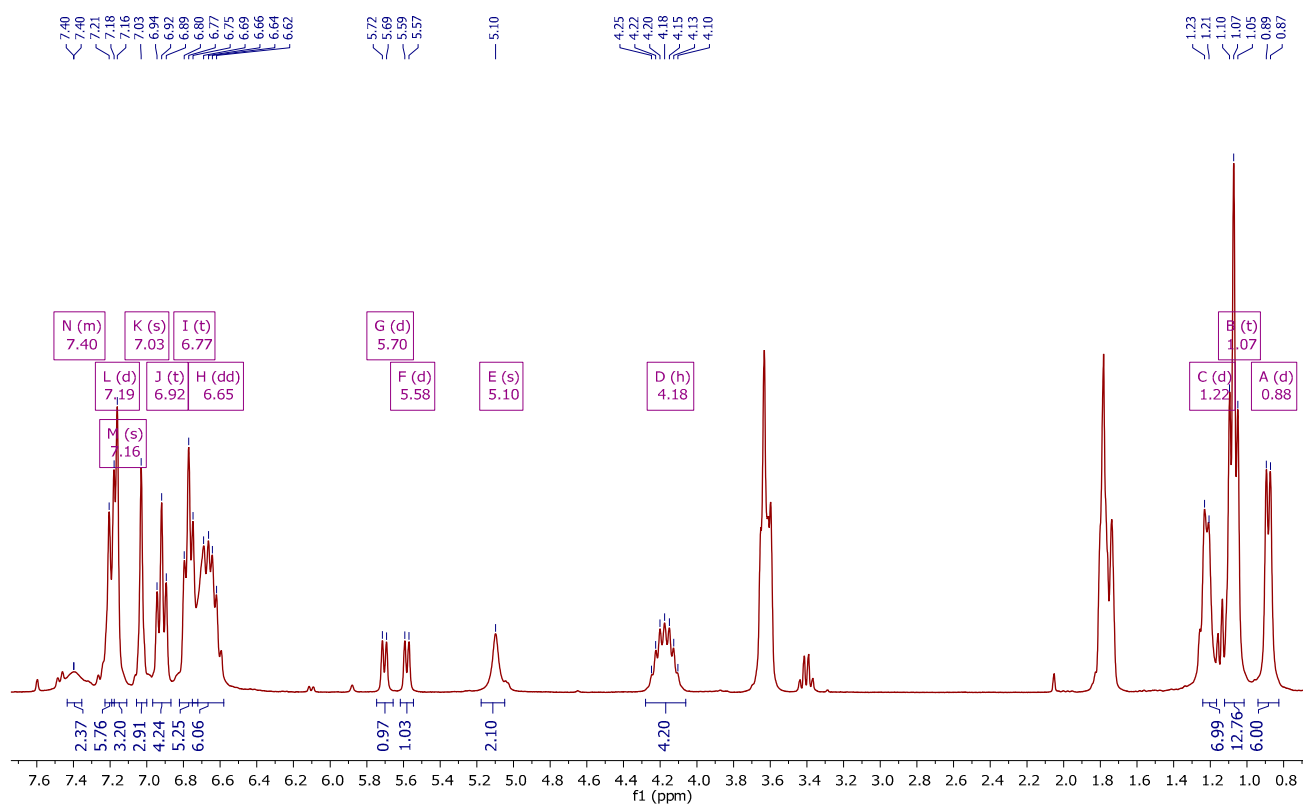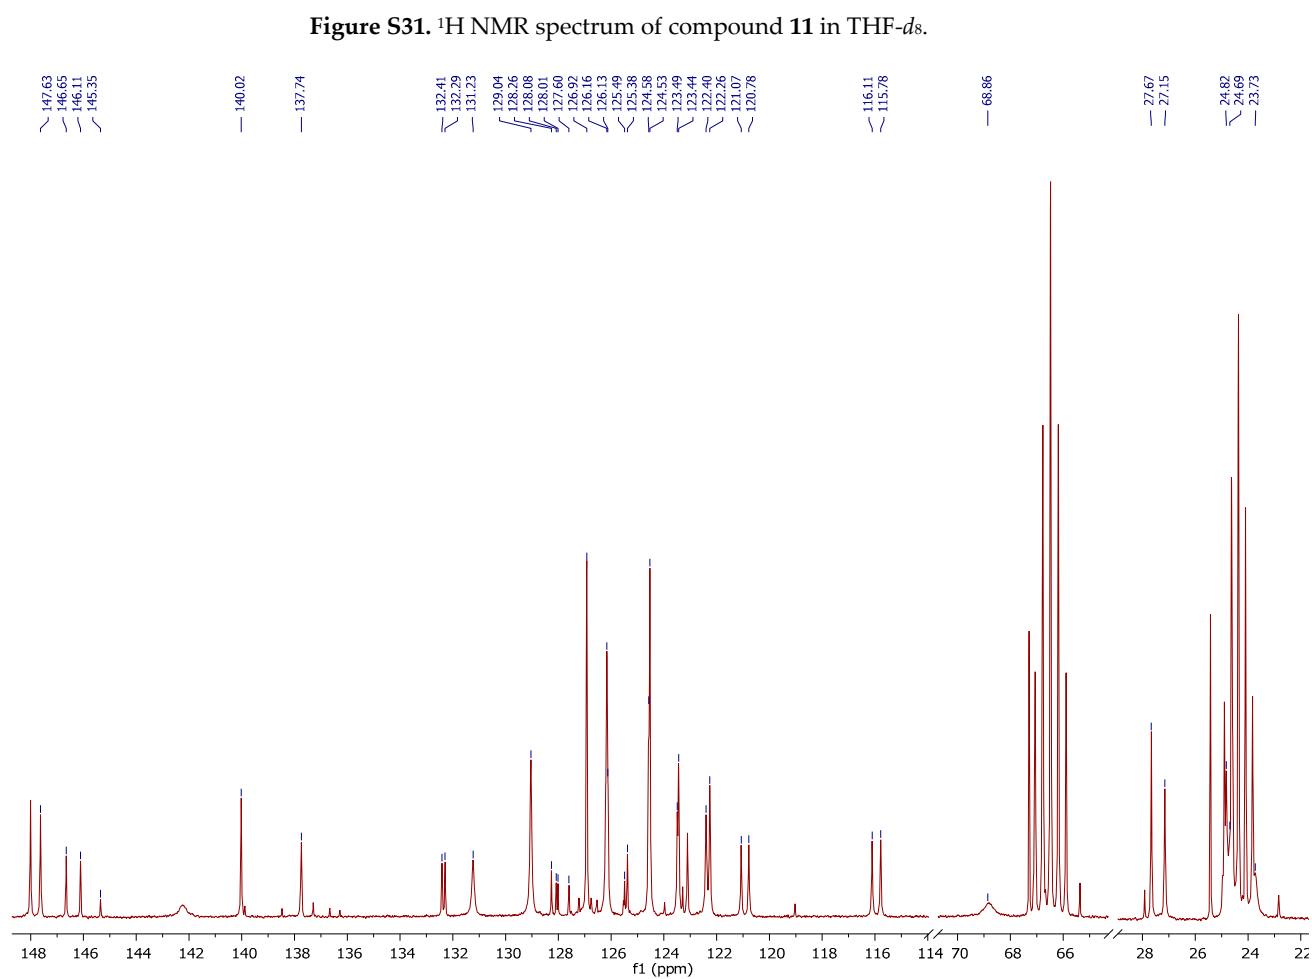



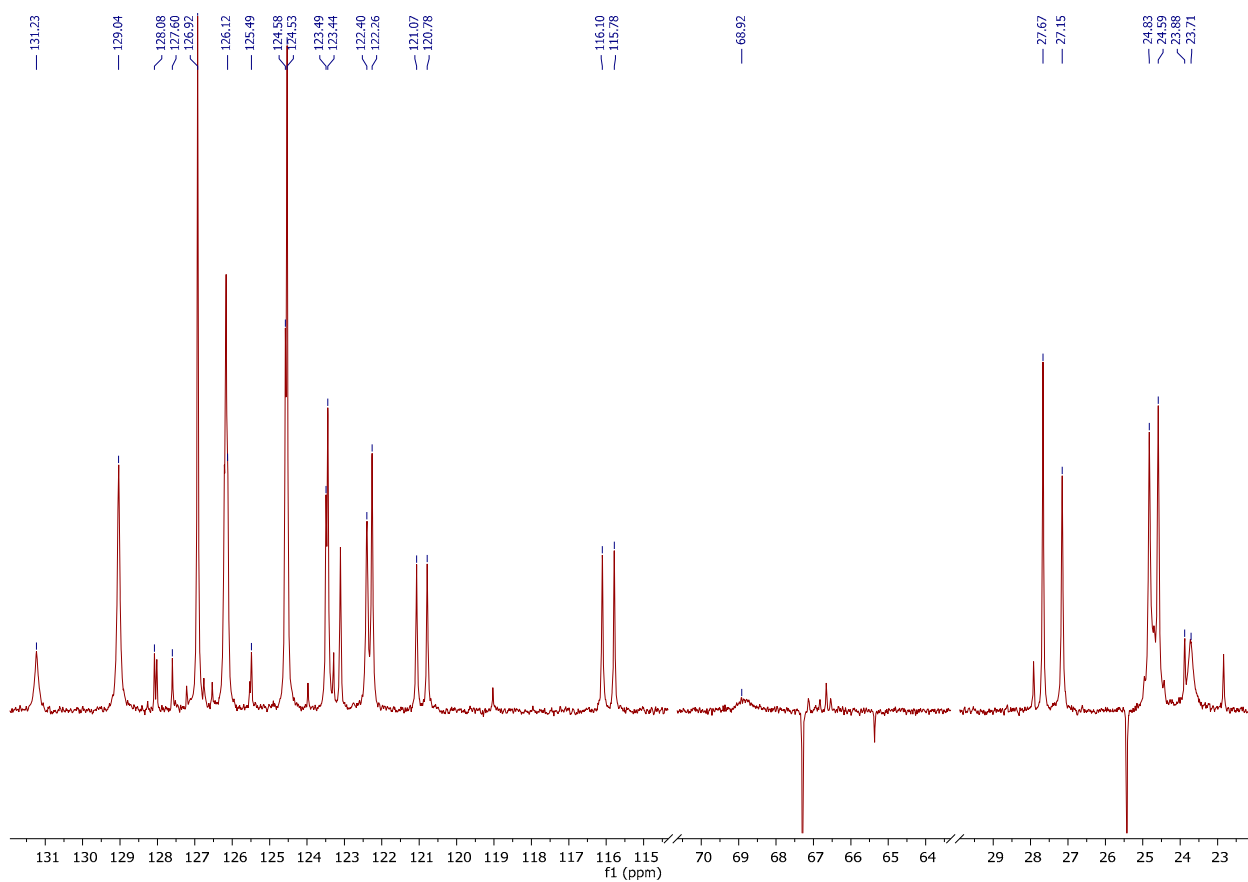

Figure S33. Selected area of DEPT135 NMR spectrum of compound **11** in THF-*d*<sub>8</sub>.

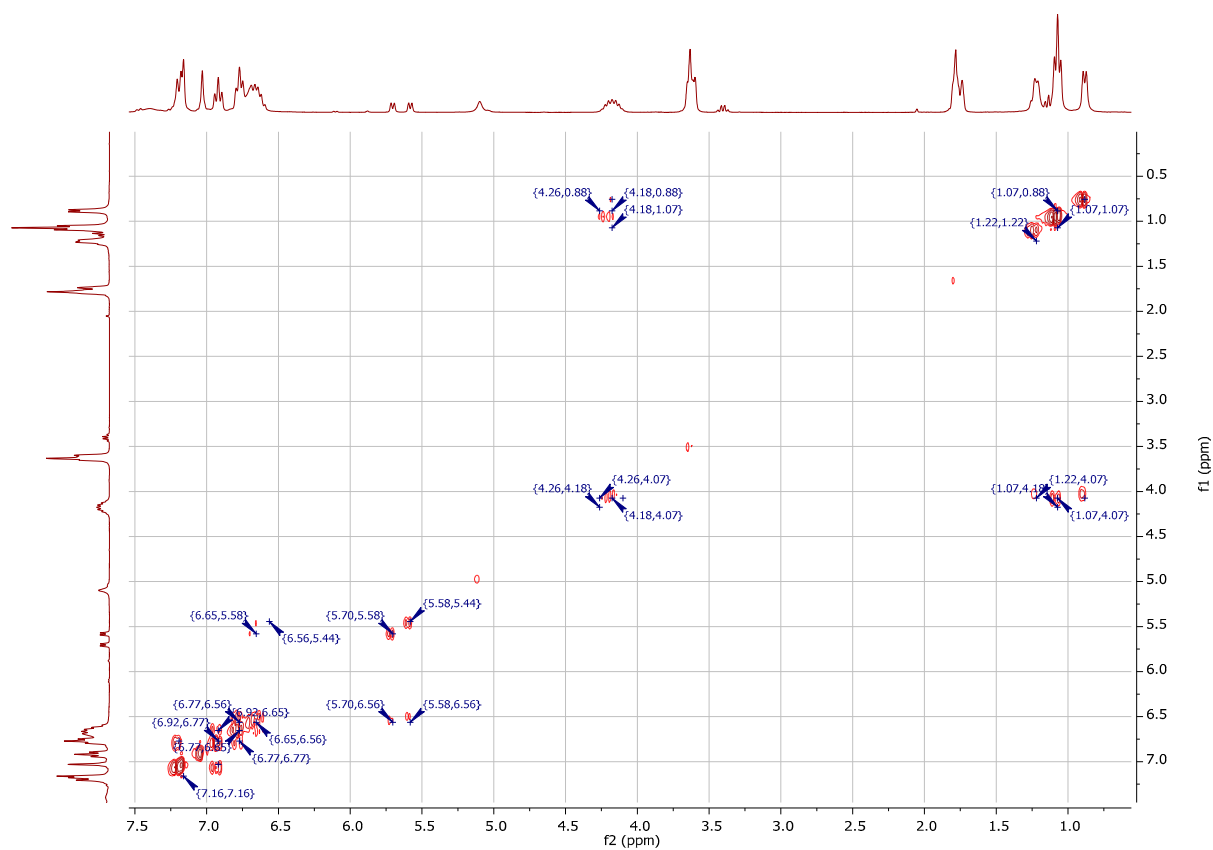

Figure S34. <sup>1</sup>H-<sup>1</sup>H COSY NMR spectrum of compound **11** in THF-*d*<sub>8</sub>.

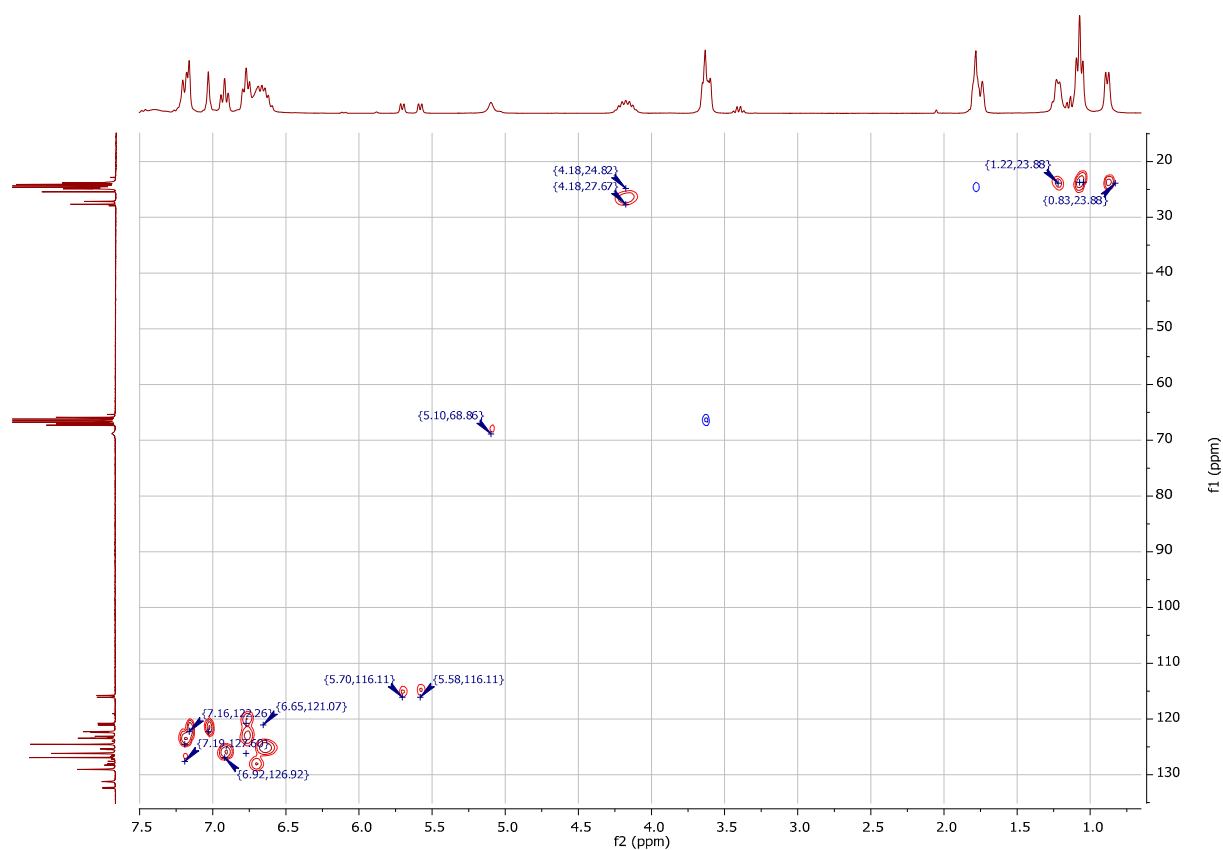

Figure S35.  $^1\text{H}$ - $^{13}\text{C}$  HSQC NMR spectrum of compound 11 in  $\text{THF-d}_8$ .

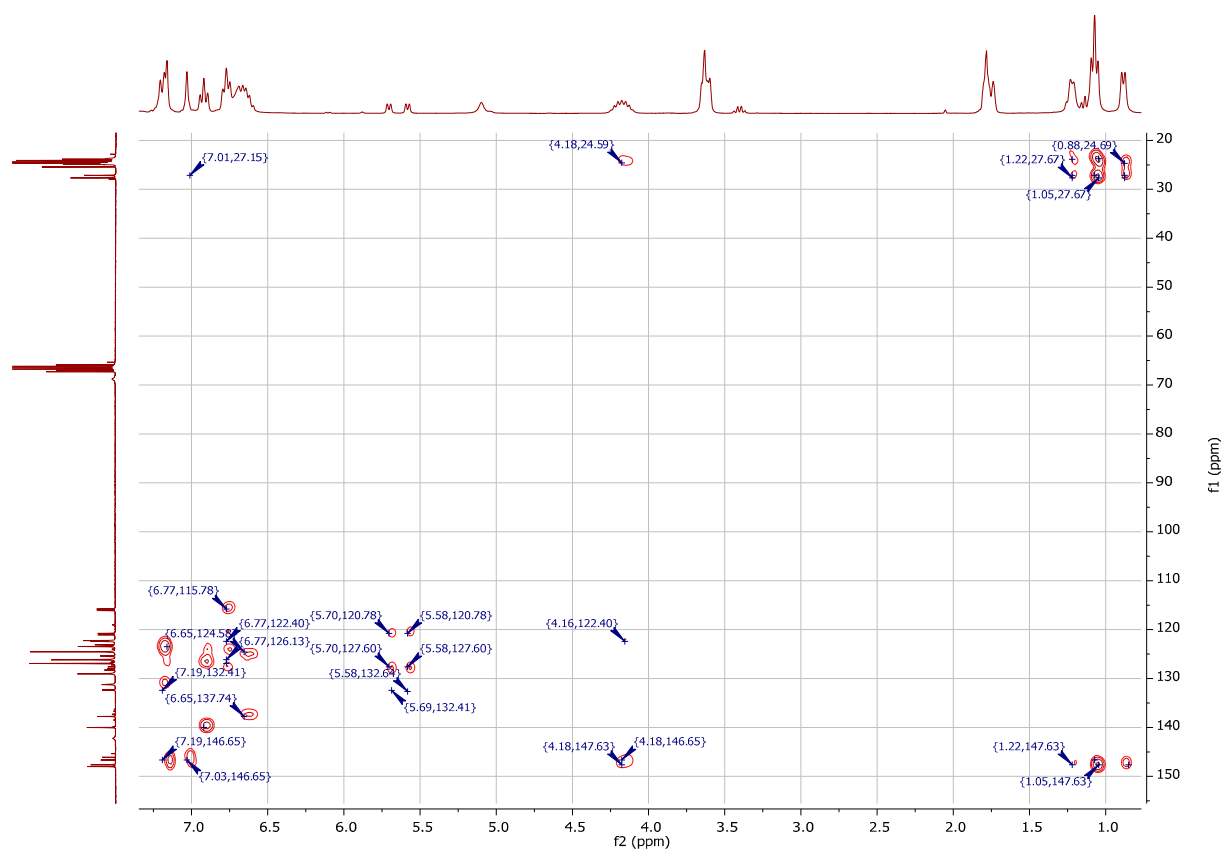

Figure S36.  $^1\text{H}$ - $^{13}\text{C}$  HMBC NMR spectrum of compound 11 in  $\text{THF-d}_8$ .

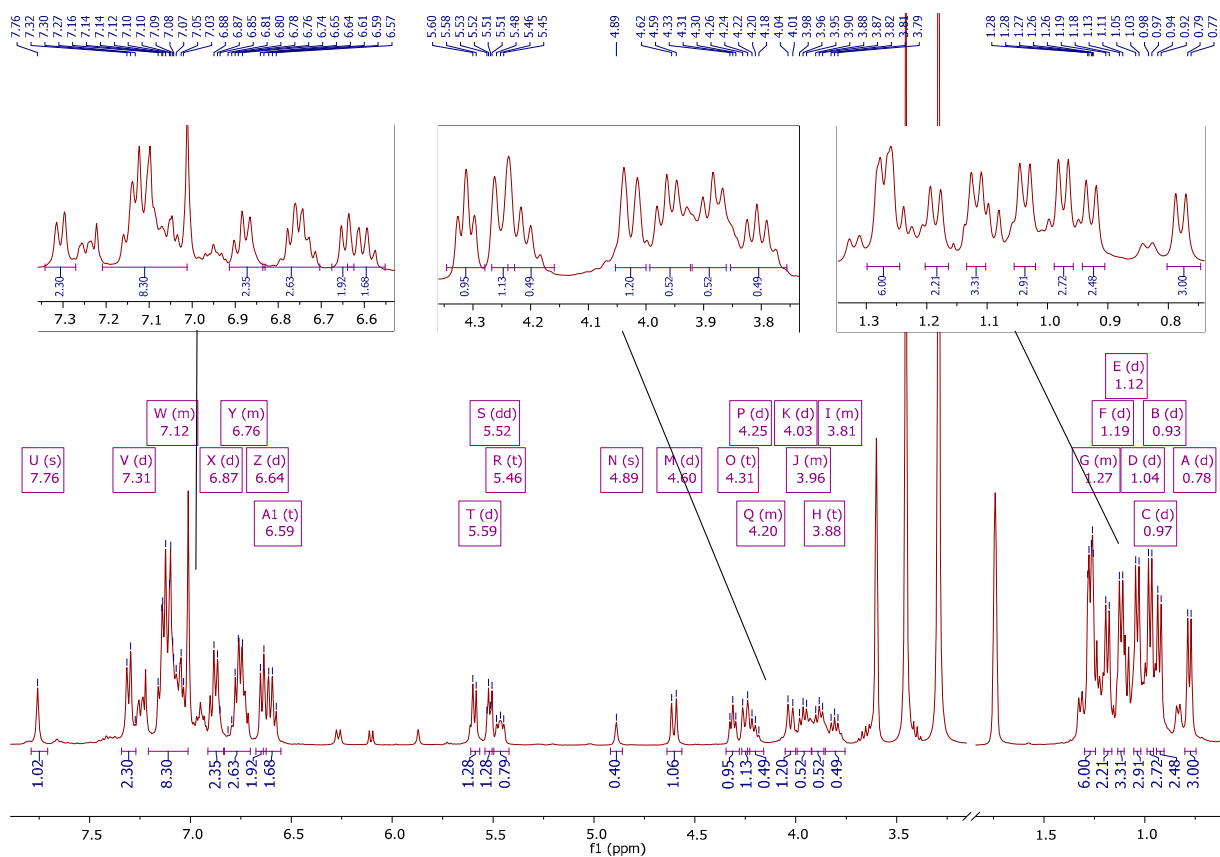

Figure S37. Selected area of  $^1\text{H}$  NMR spectrum of compound **12** in  $\text{THF-d}_8$ .

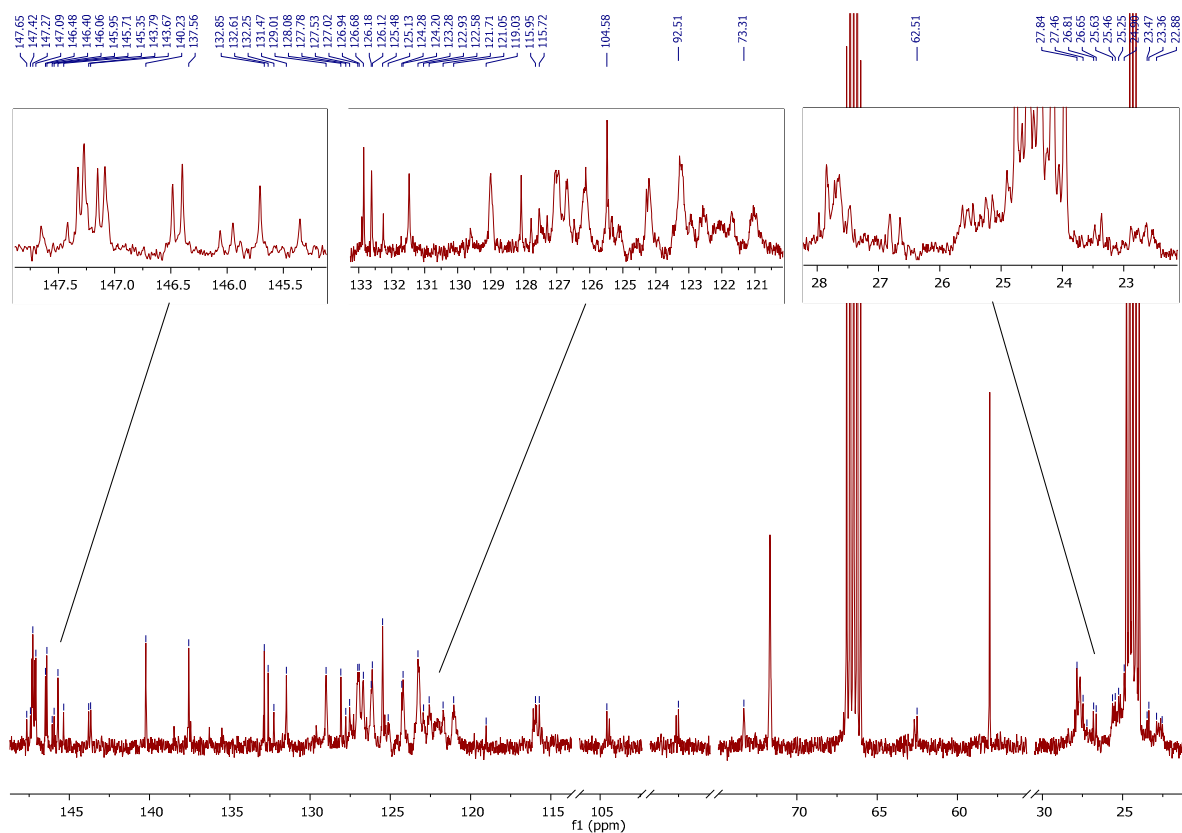

Figure S38. Selected area of  $^{13}\text{C}$  NMR spectrum of compound **12** in  $\text{THF-d}_8$ .

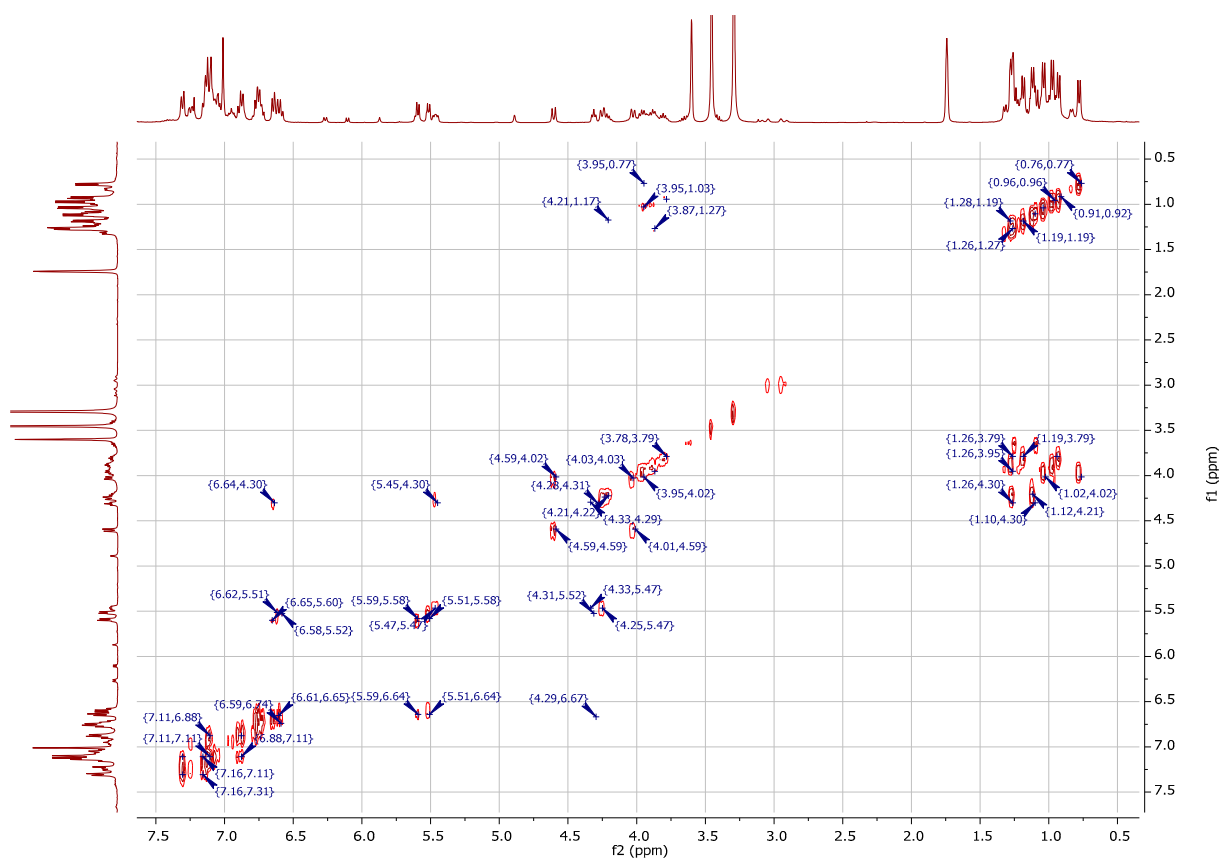

Figure S39.  $^1\text{H}$ - $^1\text{H}$  COSY NMR spectrum of compound **12** in  $\text{THF-d}_8$ .

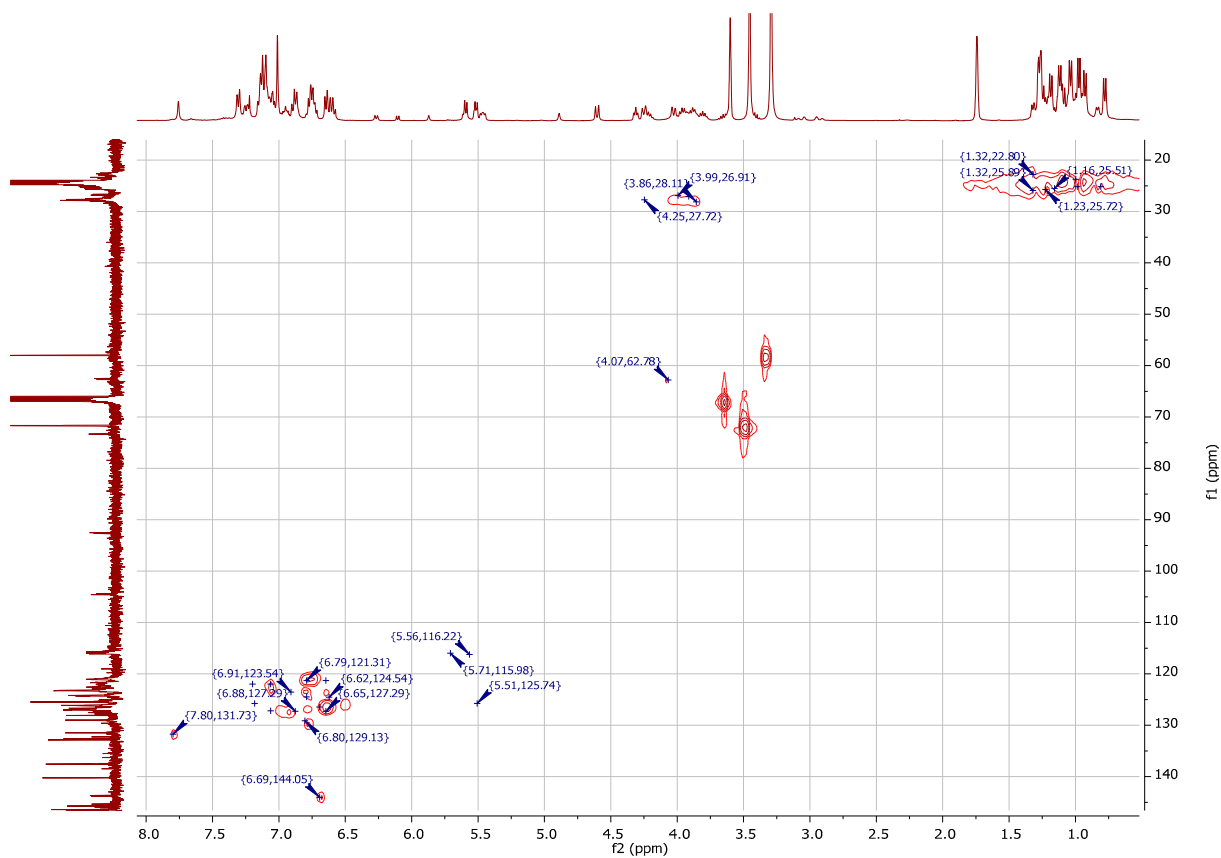

Figure S40.  $^1\text{H}$ - $^{13}\text{C}$  HSQC NMR spectrum of compound **12** in  $\text{THF-d}_8$ .

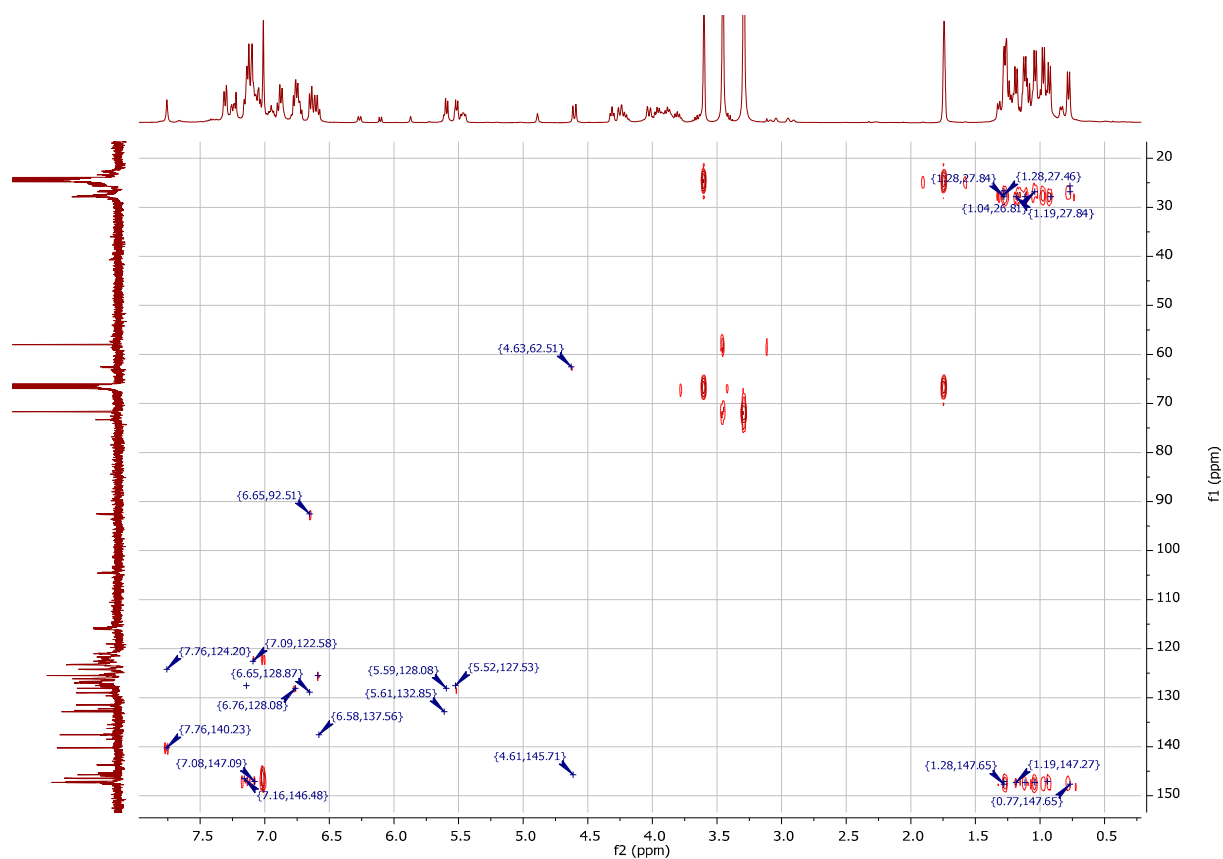

Figure S41.  $^1\text{H}$ - $^{13}\text{C}$  HMBC NMR spectrum of compound **12** in  $\text{THF-d}_8$ .

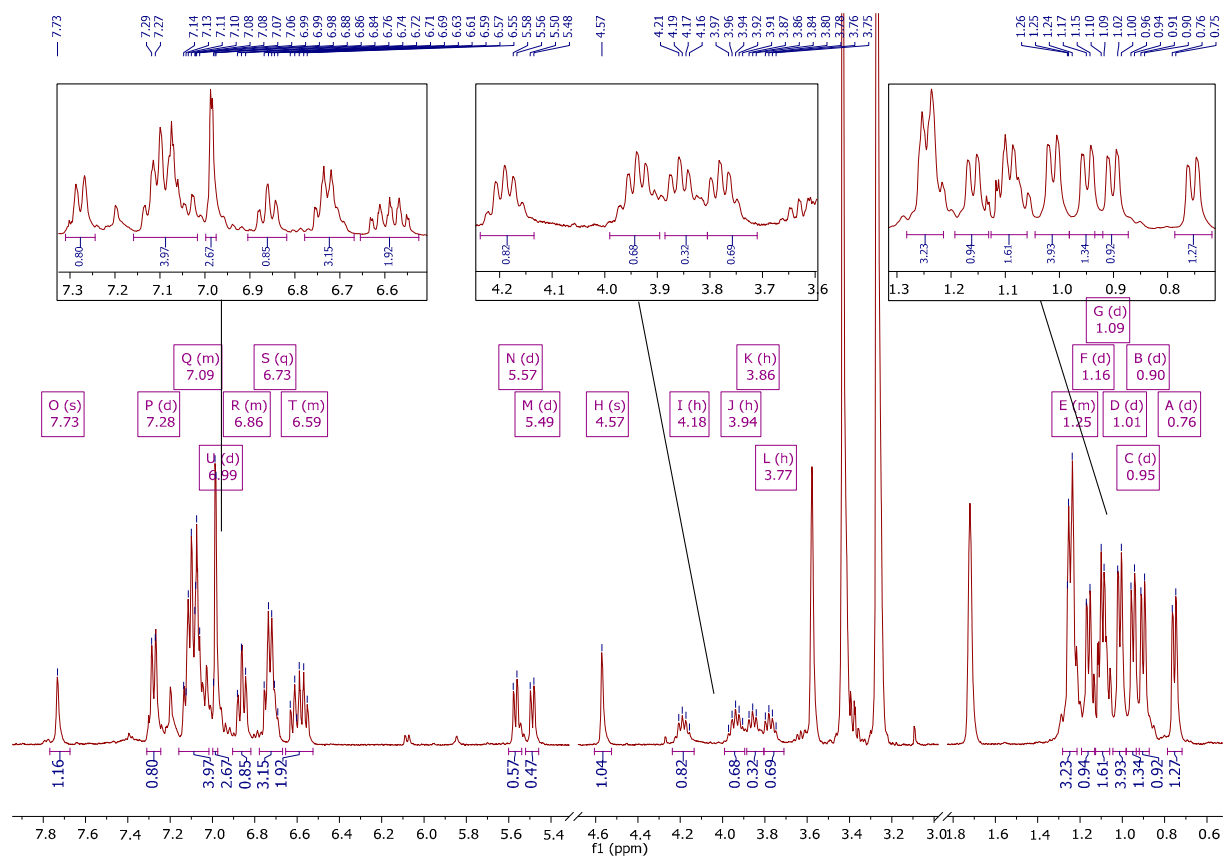

Figure S42. Selected area of  $^1\text{H}$  NMR spectrum of compound **12-d<sub>5</sub>** in  $\text{THF-d}_8$ .

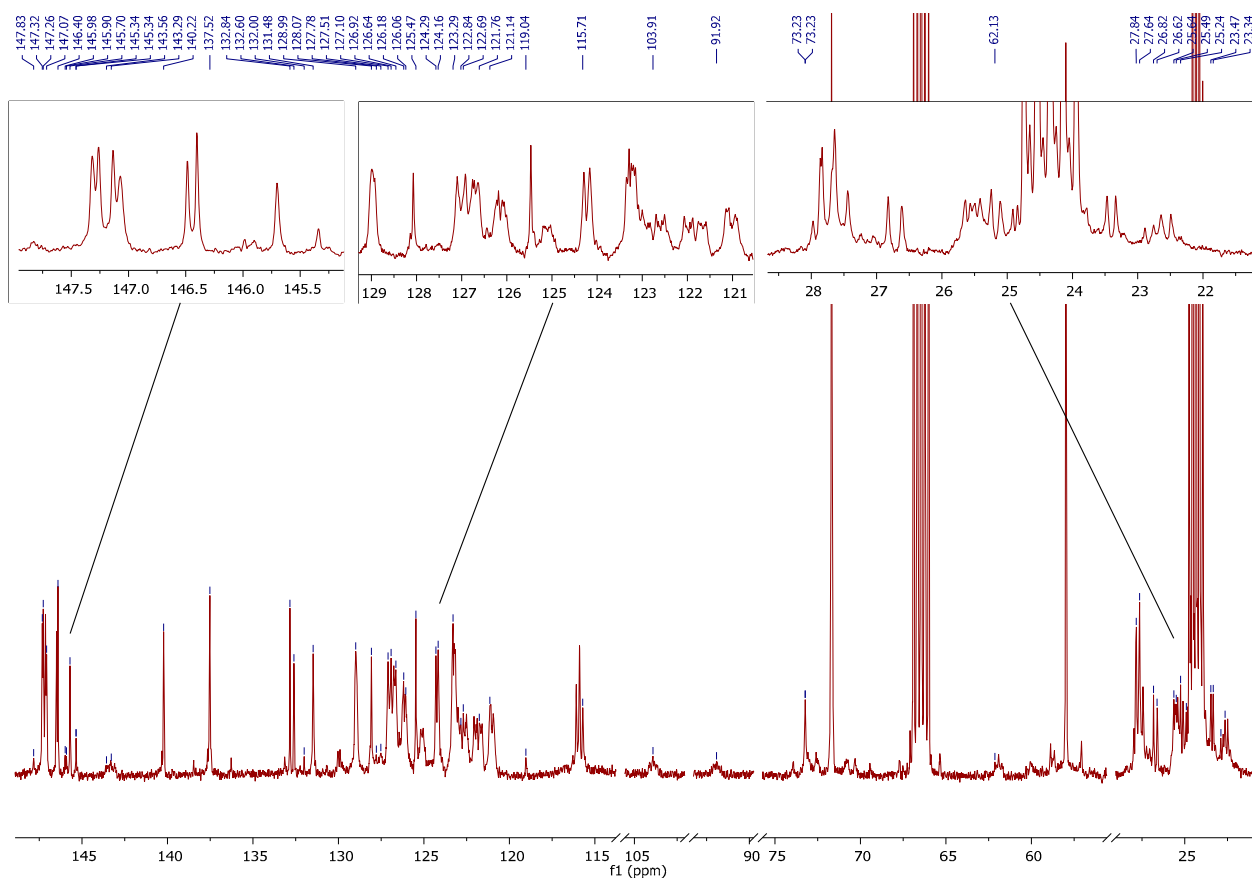

Figure S43. Selected area of  $^{13}\text{C}$  NMR spectrum of compound **12-d<sup>5</sup>** in  $\text{THF-d}_8$ .

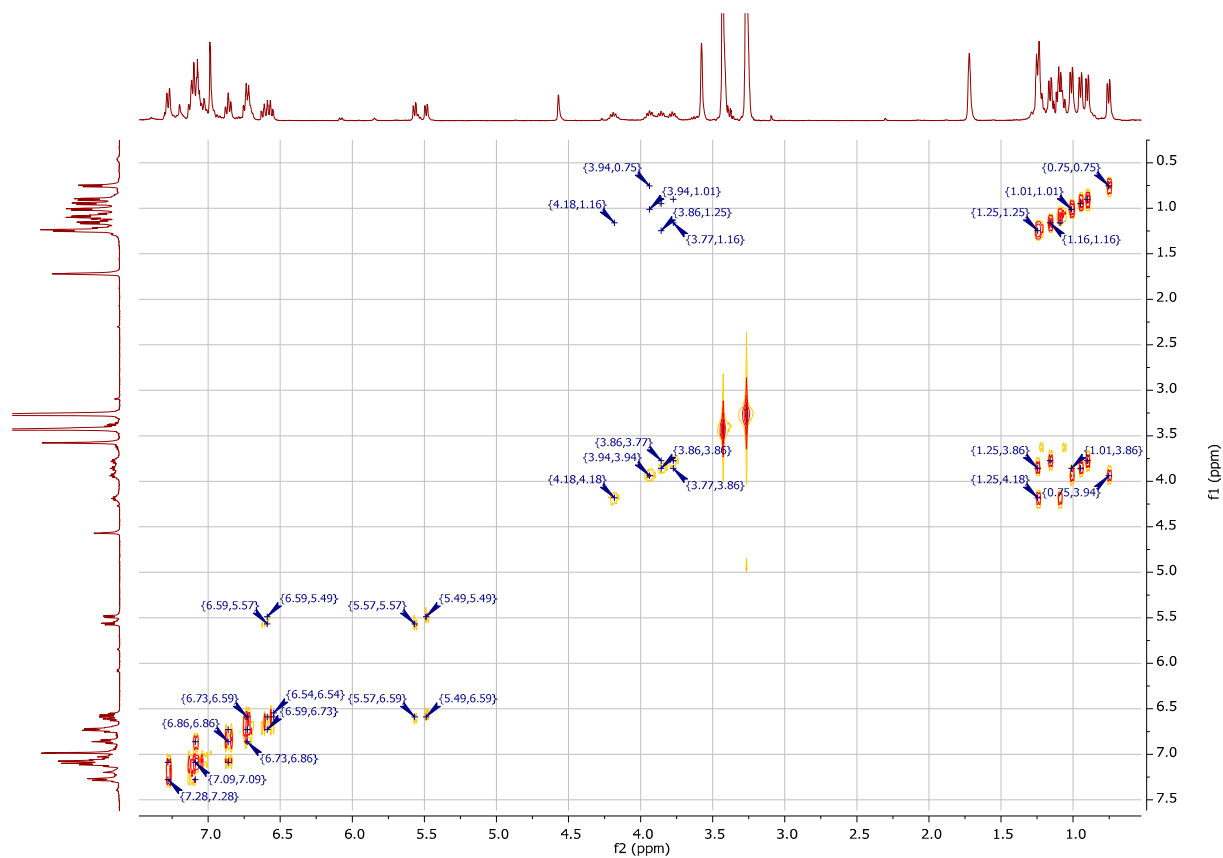

Figure S44.  $^1\text{H}$ - $^1\text{H}$  COSY NMR spectrum of compound **12-d<sup>5</sup>** in  $\text{THF-d}_8$ .



## References

88. Fedushkin, I.L.; Lukoyanov, A.N.; Tishkina, A.N.; Fukin, G.K.; Lyssenko, K.A.; Hummert, M. Reduction of digallane [(dpp-bian)Ga-Ga(dpp-bian)] with Group 1 and 2 metals. *Chem. Eur. J.* **2010**, *16*, 7563–7571. <https://doi.org/10.1002/chem.201000377>.
113. Bruker APEX3. *Bruker Molecular Analysis Research Tool*, v. 2018.7-2; Bruker AXS: Madison, WI, USA, 2018.
114. *Data Collection, Reduction and Correction Program*; CrysAlisPro 1.171.40.67a—Software Package; Rigaku OD: Tokyo, Japan, 2019.
115. Bruker. *SAINT Data Reduction and Correction Program v. 8.40B*; Bruker AXS: Madison, WI, USA, 2019.
116. Sheldrick, G.M. *SADABS v.2016/2, Bruker/Siemens Area Detector Absorption Correction Program*; Bruker AXS: Madison, WI, USA, 2016.
117. Krause, L.; Herbst-Irmer, R.; Sheldrick, G.M.; Stalke, D. Comparison of silver and molybdenum microfocus X-ray sources for single-crystal structure determination. *J. Appl. Crystallogr.* **2015**, *48*, 3–10, <https://doi.org/10.1107/S1600576714022985>.
118. *SCALE3 ABSPACK: Empirical Absorption Correction*; CrysAlisPro 1.171.40.67a—Software Package; Rigaku OD: Tokyo, Japan, 2019.
119. Farrugia, L. WinGX and ORTEP for Windows: an update. *J. Appl. Crystallogr.* **2012**, *45*, 849–854, <https://doi.org/10.1107/S0021889812029111>.
120. Sheldrick, G. SHELXT—Integrated space-group and crystal-structure determination. *Acta Crystallogr. Sect. A* **2015**, *71*, 3–8, <https://doi.org/10.1107/S2053273314026370>.
121. Sheldrick, G.M. *SHELXTL. Structure Determination Software Suite*, Version 6.14; Bruker AXS: Madison, WI, USA, 2003.
122. Sheldrick, G. Crystal structure refinement with SHELXL. *Acta Crystallogr. Sect. C* **2015**, *71*, 3–8, <https://doi.org/10.1107/S2053229614024218>.
123. Dolomanov, O.V.; Bourhis, L.J.; Gildea, R.J.; Howard, J.A.K.; Puschmann, H. OLEX2: a complete structure solution, refinement and analysis program. *J. Appl. Crystallogr.* **2009**, *42*, 339–341, <https://doi.org/10.1107/S0021889808042726>.
